# Supplementary material for: Tropical tropospheric aerosol sources and chemical composition observed at high altitude in the Bolivian Andes
Source: Copernicus journal article supplement (doi:10.5194/acp-24-2837-2024), 2024-03-05
Supplement: Supplementary file 2 [file acp-24-2837-2024-supplement.zip]

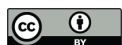

*Supplement of*

## **Tropical tropospheric aerosol sources and chemical composition observed at high altitude in the Bolivian Andes**

**C. Isabel Moreno et al.**

*Correspondence to:* C. Isabel Moreno (caisa.moreno@chacaltaya.edu.bo)

- [acp-24-2837-2024-supplement-title-page.pdf](#)
- [Moreno-supplementary-material\\_20240221.pdf](#)
- [Moreno\\_et\\_al\\_Supplementary\\_Tables\\_Chacaltaya\\_2023.xlsx](#)

The copyright of individual parts of the supplement might differ from the article licence.
