# Supplementary material for: Tropical tropospheric aerosol sources and chemical composition observed at high altitude in the Bolivian Andes
Source: Copernicus journal article supplement (doi:10.5194/acp-24-2837-2024), 2024-03-05
Supplement: Supplementary file 3 [file acp-24-2837-2024-supplement.zip]

Archive with 3 entries (3 files):
- acp-24-2837-2024-supplement-title-page.pdf
- Moreno_et_al_Supplementary_Tables_Chacaltaya_2023.xlsx
- Moreno-supplementary-material_20240221.pdf
