# Supplementary material for: Tropical tropospheric aerosol sources and chemical composition observed at high altitude in the Bolivian Andes
Source: Copernicus journal article supplement (doi:10.5194/acp-24-2837-2024), 2024-03-05
Supplement: Supplementary file 3 [file acp-24-2837-2024-supplement.zip › Moreno_et_al_Supplementary_Tables_Chacaltaya_2023.xlsx]

## Sheet: Contents
Contents of this supplement
Sheet	Contents
bulk_concentrations_STP	Statistics of species per PM10 group at standard temperature and pressure conditions (1013hPa, 0ºC)
seasonal_concentrations_STP	Statistics of species per season in each PM10 group at standard temperature and pressure conditions (1013hPa, 0ºC)
bulk_concentrations_ambient	Statistics of species per PM10 group at ambient conditions (534hPa, 0ºC)
seasonal_concentrations_ambient	Statistics of species per season in each PM10 group at ambient conditions (534hPa, 0ºC)
Wilcoxon_rank_sum_test	Comparison of median concentrations between different PM periods

## Sheet: bulk_concentrations_STP
Chacaltaya data in Sandard Temperature and Pressure (1013 hPa, 0ºC) conditions (ng/m3)
Statistics for each of the PM10 groups
PM group	N	Time period
PM10-A	59	December 2011 to July 2013
PM10-B	52	April 2016 to August 2017
PM10-C	32	February 2019 to March 2020				N= number of samples
PM2.5	80	August 2013 to December 2015				QL= quantification limit
PM group	Species	Mean	Std_dev	p25	Median	p75	N<QL
PM10A	Arabitol	3.76133	4.30757	1.51619	2.62557	4.52987	1
PM10A	Br	1.44728	0.924423	0.731349	1.27392	1.90063	9
PM10A	Ca	72.3599	42.9894	39.4654	66.4148	94.5718	4
PM10A	Cl	8.72339	7.08227	3.65865	6.16548	10.6573	12
PM10A	EC	92.7866	90.7695	34.027	68.2171	111.774	23
PM10A	F	2.0457	2.30872	0.816072	1.48481	2.43523	10
PM10A	For	12.2533	10.6861	5.34661	8.78296	16.0361	11
PM10A	Galactosan	1.99007	4.91688	0.225784	0.76403	1.31213	36
PM10A	Glucose	3.29032	2.09684	2.11896	2.64008	3.6608	5
PM10A	K	24.2334	22.8252	10.0452	17.7048	28.7285	5
PM10A	Levoglucosan	12.6275	22.6648	2.00155	5.29449	13.1822	3
PM10A	Li	0.0530005	0.07022	0.0185389	0.0375298	0.0642	11
PM10A	MSA	6.58078	3.56203	4.09237	6.66875	8.80034	5
PM10A	Mannitol	1.37592	1.09808	0.855635	1.09122	1.51005	10
PM10A	Mannosan	2.91799	5.47019	0.563	0.989207	2.6062	42
PM10A	Mg	7.28366	4.51074	3.97045	6.82965	10.0936	3
PM10A	NH4	158.056	106.039	79.0992	144.812	220.006	1
PM10A	NO3	149.117	114.238	50.9402	127.913	218.944	1
PM10A	Na	25.2299	20.8155	9.6025	21.9108	31.9945	5
PM10A	OC	913.324	648.033	514.209	702.549	1252.79	3
PM10A	Ox	32.8469	40.8234	3.65433	22.6262	48.8233	2
PM10A	SO4	450.707	326.688	204.796	399.238	648.722	1
PM10A	Sorbitol	0.242277	0.190539	0.133873	0.166283	0.312685	56
PM10B	Arabitol	1.0414	0.323584	0.837972	0.964786	1.16589	21
PM10B	Br	1.62674	1.53628	0.400611	1.08586	2.64282	14
PM10B	Ca	57.4489	42.9545	26.8608	51.322	73.1593	4
PM10B	Cl	10.8464	11.9074	2.83755	7.72533	12.1741	18
PM10B	EC	77.698	68.6643	34.8389	56.5206	100.057	3
PM10B	Erythritol	0.968562	0.639341	0.55604	0.763385	1.23341	17
PM10B	F	1.48575	1.17187	0.643835	1.12625	2.09765	10
PM10B	For	27.5716	68.934	6.09498	9.8016	12.7485	36
PM10B	Galactosan	5.01151	8.09269	0.718799	2.34627	5.07588	26
PM10B	Glucose	2.91215	1.74798	1.63998	2.45839	3.66532	8
PM10B	Glycerol	3.94394	2.26996	1.91462	3.87828	5.7866	29
PM10B	Inositol	0.58049	0.257589	0.346682	0.634473	0.73606	28
PM10B	K	34.1249	34.047	8.18403	15.48	56.0367	5
PM10B	Levoglucosan	36.5912	41.0876	5.92377	26.4625	46.2209	20
PM10B	Li	0.0120956	0.0226645	0.00266387	0.0045094	0.0119478	33
PM10B	MSA	6.72863	3.45239	4.72365	6.21983	8.42615	4
PM10B	Mannitol	1.84792	1.04491	1.13534	1.62655	2.19692	12
PM10B	Mannosan	6.92571	9.50826	1.4453	4.07069	7.68163	27
PM10B	Mg	6.86182	6.65811	2.03993	5.03649	8.21838	3
PM10B	NH4	316.397	196.101	142.828	306.148	455.819	3
PM10B	NO3	109.892	115.785	19.7274	71.0677	158.093	7
PM10B	Na	29.9287	26.8079	15.1192	22.694	35.3967	11
PM10B	OC	801.016	604.491	365.635	605.396	1096.42	3
PM10B	Ox	38.0188	37.4277	3.8327	30.29	57.8438	7
PM10B	Rhamnose	0.634166	0.547817	0.440484	0.634166	0.827849	50
PM10B	SO4	991.192	761.148	349.121	919.917	1379.1	0
PM10B	Sorbitol	9.45902	8.57803	5.5218	7.8568	10.5138	28
PM10B	Threalose	1.79074	1.11317	1.04338	1.65283	2.25688	41
PM10B	Xylitol						52
PM10C	Arabitol	0.55718	0.377363	0.26734	0.507484	0.735312	10
PM10C	Br	0.956395	0.803109	0.445904	0.77649	1.06394	4
PM10C	Ca	51.4361	42.0002	18.5673	36.1745	72.8181	0
PM10C	Cl	3.56168	3.7309	0.453076	2.04118	6.08543	7
PM10C	EC	65.7553	48.5479	39.5422	51.2978	78.5181	0
PM10C	Erythritol	0.901568	0.494238	0.507539	0.82738	1.22141	28
PM10C	F	0.245466	0.364723	0.01912	0.0746378	0.346977	18
PM10C	For	2.59021	1.5742	1.52926	2.21543	3.42405	5
PM10C	Galactosan	1.09296	0.940714	0.272297	1.0423	1.16612	18
PM10C	Glucose	1.81447	1.12284	1.01528	1.58684	2.40952	9
PM10C	Glycerol	5.59687	6.59381	2.3487	3.27425	4.88821	22
PM10C	Inositol	0.792116	0.337249	0.564969	0.832445	0.978186	3
PM10C	K	25.6993	26.2903	8.73177	19.9224	28.3543	1
PM10C	Levoglucosan	10.9959	10.6241	4.03482	6.77058	15.1977	13
PM10C	Li	0.015279	0.011562	0.0064813	0.0133328	0.0172778	5
PM10C	MSA	4.52234	2.48271	2.66742	4.83011	6.20259	0
PM10C	Mannitol	1.16931	0.874646	0.502105	0.923334	1.50216	19
PM10C	Mannosan	1.37735	1.32021	0.457249	1.10066	1.39955	18
PM10C	Mg	6.66187	4.89459	4.01142	5.76393	6.8809	0
PM10C	NH4	280.74	160.511	187.293	248.077	341.374	0
PM10C	NO3	45.2698	45.8193	10.2484	28.6019	63.8202	3
PM10C	Na	12.0452	10.2808	4.92714	9.17367	16.2696	1
PM10C	OC	607.098	448.799	299.153	529.385	721.075	0
PM10C	Ox	53.156	31.6965	32.4639	43.634	56.5756	0
PM10C	Rhamnose						32
PM10C	SO4	904.604	499.173	569.495	889.386	1203.83	0
PM10C	Sorbitol	3.77346	2.34214	2.79167	3.87468	4.85647	28
PM10C	Threalose	0.61325	0.379511	0.299743	0.549937	0.847325	19
PM10C	Xylitol						32
PM2.5	Arabitol	1.66579	0.875146	1.10269	1.44517	1.93299	36
PM2.5	Br	1.17615	0.794351	0.650561	0.910814	1.42375	11
PM2.5	Ca	90.834	78.3895	42.7925	74.4844	114.679	1
PM2.5	Cl	13.2807	11.0139	5.94012	9.78526	17.5083	35
PM2.5	EC	80.6577	48.5736	45.7597	69.6776	99.4743	6
PM2.5	Erythritol	1.10491	0.328974	0.915077	0.925503	1.20505	77
PM2.5	F	2.79713	2.4863	1.13946	1.78779	3.77461	4
PM2.5	For	13.795	6.99366	8.93124	12.0175	15.6156	30
PM2.5	Galactosan	1.38097	2.25764	0.378483	0.572643	1.12046	32
PM2.5	Glucose	3.69361	2.63974	1.96166	3.04029	4.45515	32
PM2.5	Glycerol						80
PM2.5	Inositol	0.409671	0.145536	0.326385	0.382879	0.442102	64
PM2.5	K	26.4457	17.8159	14.2655	23.268	36.181	3
PM2.5	Levoglucosan	14.2915	18.8725	3.50843	8.47491	17.1859	10
PM2.5	Li	0.0319208	0.0331084	0.0141782	0.0254135	0.0388893	28
PM2.5	MSA	7.85907	4.41278	5.18473	7.4515	10.1475	4
PM2.5	Mannitol	1.68659	1.24261	0.934243	1.36595	2.09524	37
PM2.5	Mannosan	2.0565	3.66648	0.348284	0.799483	1.50016	30
PM2.5	Mg	8.62045	5.50639	4.65289	7.8735	11.4321	5
PM2.5	NH4	305.314	191.566	163.495	295.307	412.522	2
PM2.5	NO3	84.9009	79.2274	33.9463	65.5809	104.542	4
PM2.5	Na	25.2229	15.3776	13.7236	20.1387	33.7812	9
PM2.5	OC	880.972	728.854	484.814	669.285	1107.78	3
PM2.5	Ox	44.0192	30.514	22.1011	40.2942	53.7543	4
PM2.5	Rhamnose						80
PM2.5	SO4	1121.34	794.903	519.569	1046.58	1532.15	1
PM2.5	Sorbitol	10.3342	7.42897	4.85392	6.74462	12.1394	51
PM2.5	Threalose	1.44545	0.891793	0.92845	1.17262	1.69238	59
PM2.5	Xylitol						80

## Sheet: seasonal_concentrations_STP
Chacaltaya data in Sandard Temperature and Pressure (1013 hPa, 0ºC) conditions (ng/m3)
Statistics for the each season within every PM10 group
				Number of samples
PM group	Time period		Wet-to-dry season	Wet season	Dry season	Dry-to-wet season
PM10-A	December 2011 to July 2013		5	17	23	14
PM10-B	April 2016 to August 2017		5	14	23	10
PM10-C	February 2019 to March 2020		4	11	15	2		N= number of samples
PM2.5	August 2013 to December 2015		6	11	35	28		QL= quantification limit
PM group	Months	Season	species	mean	std_dev	p25	median	p75	nas
PM10A	A	Wet-to-dry transition	Arabitol	2.31532	1.15736	1.54274	1.88061	2.3469	0
PM10A	A	Wet-to-dry transition	Br	0.683308	0.347746	0.423434	0.780569	0.874388	0
PM10A	A	Wet-to-dry transition	Ca	41.0637	28.4138	20.5089	35.1164	66.4148	0
PM10A	A	Wet-to-dry transition	Cl	5.57589	1.769	4.50431	5.43025	6.50183	1
PM10A	A	Wet-to-dry transition	EC	73.3875	11.9056	69.1782	73.3875	77.5968	3
PM10A	A	Wet-to-dry transition	F	0.930767	0.471398	0.549131	0.799721	1.42215	0
PM10A	A	Wet-to-dry transition	For	5.11507	1.45103	4.42845	5.35775	6.04436	1
PM10A	A	Wet-to-dry transition	Galactosan	0.14032	0.0559154	0.120551	0.14032	0.160089	3
PM10A	A	Wet-to-dry transition	Glucose	2.35698	0.61691	1.85037	2.43649	2.67961	0
PM10A	A	Wet-to-dry transition	K	10.6075	6.97144	5.17752	8.55655	14.6175	0
PM10A	A	Wet-to-dry transition	Levoglucosan	2.62097	1.13977	2.01397	2.22288	2.25659	0
PM10A	A	Wet-to-dry transition	Li	0.0265156	0.016912	0.0205363	0.0265156	0.0324949	3
PM10A	A	Wet-to-dry transition	MSA	9.50528	3.49404	8.10618	8.64243	11.1002	0
PM10A	A	Wet-to-dry transition	Mannitol	0.782348	0.227165	0.735863	0.801086	0.883757	0
PM10A	A	Wet-to-dry transition	Mannosan						5
PM10A	A	Wet-to-dry transition	Mg	5.62307	5.13349	1.83058	3.24555	8.43195	0
PM10A	A	Wet-to-dry transition	NH4	157.021	82.5889	103.207	111.959	230.673	0
PM10A	A	Wet-to-dry transition	NO3	126.081	51.5217	109.913	151.038	156.882	0
PM10A	A	Wet-to-dry transition	Na	22.7189	12.2192	17.7184	26.1841	31.1846	1
PM10A	A	Wet-to-dry transition	OC	621.087	113.723	529.924	591.144	661.412	0
PM10A	A	Wet-to-dry transition	Ox	22.5459	20.9175	1.81199	22.6262	42.9872	0
PM10A	A	Wet-to-dry transition	SO4	413.019	277.206	213.82	241.552	649.682	0
PM10A	DJFM	Wet season	Arabitol	2.71895	1.75581	1.51219	2.15957	2.78334	0
PM10A	DJFM	Wet season	Br	0.861558	1.09456	0.410038	0.517325	0.687345	8
PM10A	DJFM	Wet season	Ca	39.041	30.0727	21.1473	31.0703	47.9382	3
PM10A	DJFM	Wet season	Cl	3.97467	2.60409	2.57452	3.2224	4.60793	6
PM10A	DJFM	Wet season	EC	41.858	23.4369	24.0552	32.5608	62.729	5
PM10A	DJFM	Wet season	F	0.923488	0.411781	0.713029	0.872776	0.96701	7
PM10A	DJFM	Wet season	For	8.28671	6.74267	4.19176	6.05058	8.90849	4
PM10A	DJFM	Wet season	Galactosan						17
PM10A	DJFM	Wet season	Glucose	3.70499	2.86346	2.14741	3.32144	4.02014	4
PM10A	DJFM	Wet season	K	8.61182	4.81452	4.14789	8.65816	11.6433	4
PM10A	DJFM	Wet season	Levoglucosan	1.41893	1.37777	0.662158	1.10106	1.42364	2
PM10A	DJFM	Wet season	Li	0.0201376	0.0219479	0.0083894	0.0102205	0.0185264	7
PM10A	DJFM	Wet season	MSA	3.38492	2.4663	1.4172	3.14512	4.95442	5
PM10A	DJFM	Wet season	Mannitol	1.41829	1.35532	0.837646	1.09425	1.26195	5
PM10A	DJFM	Wet season	Mannosan						17
PM10A	DJFM	Wet season	Mg	4.70935	3.45426	1.94127	3.52363	7.48508	2
PM10A	DJFM	Wet season	NH4	89.138	77.1107	13.9982	80.7762	143.492	1
PM10A	DJFM	Wet season	NO3	49.464	49.6205	7.5983	31.5503	63.5737	0
PM10A	DJFM	Wet season	Na	15.8038	9.80757	5.37281	17.7182	22.8642	2
PM10A	DJFM	Wet season	OC	479.152	293.865	304.184	393.404	575.62	2
PM10A	DJFM	Wet season	Ox	27.5983	21.4309	11.2193	26.0549	31.5031	0
PM10A	DJFM	Wet season	SO4	302.142	274.493	42.2545	242.177	554.572	1
PM10A	DJFM	Wet season	Sorbitol	0.133873	0.0458354	0.117668	0.133873	0.150078	15
PM10A	MJJA	Dry season	Arabitol	2.62365	2.15186	1.20301	1.64895	3.53367	1
PM10A	MJJA	Dry season	Br	1.3098	0.536661	1.05054	1.25851	1.561	1
PM10A	MJJA	Dry season	Ca	84.5802	32.8948	61.5332	80.186	95.1115	1
PM10A	MJJA	Dry season	Cl	9.08035	7.80008	4.1962	6.82429	9.49285	1
PM10A	MJJA	Dry season	EC	70.5857	59.9155	33.885	44.8193	113.037	15
PM10A	MJJA	Dry season	F	1.58163	1.06425	0.813733	1.28251	1.8346	3
PM10A	MJJA	Dry season	For	13.2806	8.68487	6.13309	12.4643	16.6284	5
PM10A	MJJA	Dry season	Galactosan	3.45745	6.93428	0.534724	0.908893	2.74477	12
PM10A	MJJA	Dry season	Glucose	2.5106	0.903556	1.95196	2.34533	3.02491	1
PM10A	MJJA	Dry season	K	23.7758	16.8631	13.187	20.4396	26.1617	1
PM10A	MJJA	Dry season	Levoglucosan	18.3561	30.6385	5.83352	9.60358	17.3566	1
PM10A	MJJA	Dry season	Li	0.0420215	0.0217399	0.0289963	0.0395994	0.0502038	1
PM10A	MJJA	Dry season	MSA	7.39362	3.21301	5.68184	6.79284	9.86958	0
PM10A	MJJA	Dry season	Mannitol	1.10123	0.462964	0.837483	1.03735	1.28142	4
PM10A	MJJA	Dry season	Mannosan	2.70906	5.83047	0.263668	0.807279	1.52068	9
PM10A	MJJA	Dry season	Mg	6.58218	2.46656	4.57337	5.90566	8.75861	1
PM10A	MJJA	Dry season	NH4	133.617	65.5502	92.8143	127.11	167.774	0
PM10A	MJJA	Dry season	NO3	190.834	84.6479	123.335	188.621	232.435	1
PM10A	MJJA	Dry season	Na	20.9585	16.2535	9.53565	16.177	23.1315	2
PM10A	MJJA	Dry season	OC	1002.61	543.103	586.43	848.528	1323.7	1
PM10A	MJJA	Dry season	Ox	15.1749	20.4826	1.68616	3.65433	33.1671	2
PM10A	MJJA	Dry season	SO4	334.692	166.926	238.244	303.316	423.286	0
PM10A	SON	Dry-to-wet transition	Arabitol	7.33127	7.17848	3.68112	5.51044	6.18905	0
PM10A	SON	Dry-to-wet transition	Br	2.31271	0.825072	1.79212	2.09152	2.71147	0
PM10A	SON	Dry-to-wet transition	Ca	97.6528	47.5605	75.106	93.8956	135.273	0
PM10A	SON	Dry-to-wet transition	Cl	14.4207	6.12239	9.57909	16.661	19.1769	4
PM10A	SON	Dry-to-wet transition	EC	151.897	115.132	90.358	114.039	194.253	0
PM10A	SON	Dry-to-wet transition	F	3.90844	3.51066	1.81575	2.78066	3.10453	0
PM10A	SON	Dry-to-wet transition	For	16.9939	15.3117	7.67693	13.2086	17.5807	1
PM10A	SON	Dry-to-wet transition	Galactosan	0.745902	0.746301	0.123051	0.660319	0.997495	4
PM10A	SON	Dry-to-wet transition	Glucose	4.46389	2.42928	3.42832	3.82307	4.91635	0
PM10A	SON	Dry-to-wet transition	K	44.3247	29.6278	23.0212	34.7226	47.645	0
PM10A	SON	Dry-to-wet transition	Levoglucosan	19.2084	19.2052	5.3217	10.9084	31.2756	0
PM10A	SON	Dry-to-wet transition	Li	0.0975103	0.115896	0.0336178	0.0663667	0.0914947	0
PM10A	SON	Dry-to-wet transition	MSA	6.94024	3.36589	4.0773	8.41479	9.48733	0
PM10A	SON	Dry-to-wet transition	Mannitol	1.96659	1.46784	1.1355	1.75868	2.01576	1
PM10A	SON	Dry-to-wet transition	Mannosan	3.89298	4.08528	1.60611	2.6062	5.53646	11
PM10A	SON	Dry-to-wet transition	Mg	11.7373	4.93925	8.51304	12.5144	13.8455	0
PM10A	SON	Dry-to-wet transition	NH4	277.337	104.142	210.918	285.591	366.391	0
PM10A	SON	Dry-to-wet transition	NO3	212.797	145.931	79.7713	230.134	307.057	0
PM10A	SON	Dry-to-wet transition	Na	42.4536	27.7234	29.4309	41.1597	44.5075	0
PM10A	SON	Dry-to-wet transition	OC	1342.57	860.797	700.394	1107.74	1692.91	0
PM10A	SON	Dry-to-wet transition	Ox	69.4071	61.7483	39.6165	59.2309	75.6415	0
PM10A	SON	Dry-to-wet transition	SO4	824.551	328.901	653.157	795.168	1027.94	0
PM10A	SON	Dry-to-wet transition	Sorbitol	0.459086		0.459086	0.459086	0.459086	13
PM10B	A	Wet-to-dry transition	Arabitol	0.660005	0.0181141	0.653601	0.660005	0.66641	3
PM10B	A	Wet-to-dry transition	Br	0.522978	0.451705	0.169628	0.469651	0.823001	1
PM10B	A	Wet-to-dry transition	Ca	31.0482	21.8577	11.1477	37.371	38.9377	0
PM10B	A	Wet-to-dry transition	Cl	1.90896	1.07192	1.5947	2.51814	2.52781	2
PM10B	A	Wet-to-dry transition	EC	38.5169	10.1905	32.5775	34.7845	36.2664	0
PM10B	A	Wet-to-dry transition	Erythritol	0.383165		0.383165	0.383165	0.383165	4
PM10B	A	Wet-to-dry transition	F	0.545681	0.184934	0.438988	0.446049	0.602559	2
PM10B	A	Wet-to-dry transition	For	2.68134	0.587204	2.47373	2.68134	2.88895	3
PM10B	A	Wet-to-dry transition	Galactosan	0.651288		0.651288	0.651288	0.651288	4
PM10B	A	Wet-to-dry transition	Glucose	1.44005	0.399536	1.04273	1.45553	1.75995	0
PM10B	A	Wet-to-dry transition	Glycerol	0.902902	0.212798	0.827667	0.902902	0.978138	3
PM10B	A	Wet-to-dry transition	Inositol						5
PM10B	A	Wet-to-dry transition	K	6.31768	4.35351	4.27902	4.98763	7.19964	0
PM10B	A	Wet-to-dry transition	Levoglucosan	4.12354		4.12354	4.12354	4.12354	4
PM10B	A	Wet-to-dry transition	Li	0.00388563	0.00239031	0.00213077	0.0033763	0.00513116	1
PM10B	A	Wet-to-dry transition	MSA	8.09657	4.78438	5.34933	6.20028	9.18168	0
PM10B	A	Wet-to-dry transition	Mannitol	0.794983	0.158065	0.704408	0.723716	0.849925	2
PM10B	A	Wet-to-dry transition	Mannosan						5
PM10B	A	Wet-to-dry transition	Mg	4.9639	4.081	1.89238	4.20215	6.13952	0
PM10B	A	Wet-to-dry transition	NH4	240.818	101.022	246.356	251.268	306.148	0
PM10B	A	Wet-to-dry transition	NO3	29.424	26.8713	15.5369	18.2649	32.1521	1
PM10B	A	Wet-to-dry transition	Na	11.8258	5.5459	10.5876	10.9429	15.1192	0
PM10B	A	Wet-to-dry transition	OC	325.115	89.0769	259.26	327.813	394.983	0
PM10B	A	Wet-to-dry transition	Ox	9.29572	9.35852	1.72066	8.33777	15.9128	1
PM10B	A	Wet-to-dry transition	Rhamnose						5
PM10B	A	Wet-to-dry transition	SO4	873.917	502.468	695.662	924.598	931.218	0
PM10B	A	Wet-to-dry transition	Sorbitol	19.5355	23.5784	5.96359	7.79458	27.2369	2
PM10B	A	Wet-to-dry transition	Threalose						5
PM10B	A	Wet-to-dry transition	Xylitol						5
PM10B	DJFM	Wet season	Arabitol	1.422	0.530273	1.04832	1.29994	1.67362	10
PM10B	DJFM	Wet season	Br	0.459731	0.160843	0.39542	0.416185	0.580567	9
PM10B	DJFM	Wet season	Ca	23.8491	21.2104	8.03453	13.1096	35.0628	2
PM10B	DJFM	Wet season	Cl	1.57295	1.27483	1.12223	1.57295	2.02367	12
PM10B	DJFM	Wet season	EC	36.6406	19.9462	18.7874	33.4547	47.551	1
PM10B	DJFM	Wet season	Erythritol	0.504825	0.242555	0.333896	0.449361	0.651735	9
PM10B	DJFM	Wet season	F	0.570428	0.414687	0.361425	0.469713	0.782852	4
PM10B	DJFM	Wet season	For	8.6853	4.5695	5.71125	8.19288	11.1669	10
PM10B	DJFM	Wet season	Galactosan	0.472648	0.115513	0.431808	0.472648	0.513488	12
PM10B	DJFM	Wet season	Glucose	3.2609	2.09009	1.85931	2.24418	4.69585	4
PM10B	DJFM	Wet season	Glycerol	4.69306	3.16434	2.3395	4.95974	7.3133	10
PM10B	DJFM	Wet season	Inositol	0.486781	0.254437	0.347059	0.425617	0.595921	11
PM10B	DJFM	Wet season	K	8.22434	6.88498	2.4496	7.90779	11.4906	3
PM10B	DJFM	Wet season	Levoglucosan	6.30623	2.63243	5.11343	5.81562	7.00842	10
PM10B	DJFM	Wet season	Li	0.00629661	0.00720039	0.00265949	0.00369742	0.00733455	10
PM10B	DJFM	Wet season	MSA	3.76412	2.71171	1.469	3.25087	6.09148	2
PM10B	DJFM	Wet season	Mannitol	2.56708	1.49166	1.66174	2.12753	2.96063	5
PM10B	DJFM	Wet season	Mannosan	0.830272	0.212333	0.712577	0.77198	0.918821	11
PM10B	DJFM	Wet season	Mg	3.161	3.00756	0.986069	1.48039	5.75148	1
PM10B	DJFM	Wet season	NH4	174.256	146.364	66.8077	109.155	265.303	1
PM10B	DJFM	Wet season	NO3	29.5628	33.603	6.12773	14.1771	44.8771	3
PM10B	DJFM	Wet season	Na	21.2698	12.9837	11.6882	23.3297	30.9392	8
PM10B	DJFM	Wet season	OC	370.958	240.05	160.269	349.341	488.511	1
PM10B	DJFM	Wet season	Ox	18.5475	20.3744	2.59761	8.81148	32.9873	3
PM10B	DJFM	Wet season	Rhamnose						14
PM10B	DJFM	Wet season	SO4	510.791	454.747	167.062	334.615	844.213	0
PM10B	DJFM	Wet season	Sorbitol	9.76616	3.04944	7.76333	9.75736	12.5891	6
PM10B	DJFM	Wet season	Threalose	1.54037	1.25865	0.88183	1.41399	2.13572	11
PM10B	DJFM	Wet season	Xylitol						14
PM10B	MJJA	Dry season	Arabitol	1.03326	0.235721	0.869023	0.964786	1.16272	6
PM10B	MJJA	Dry season	Br	1.6619	1.23936	0.447231	1.73156	2.35678	3
PM10B	MJJA	Dry season	Ca	63.3652	30.4909	50.9506	58.7767	75.0181	2
PM10B	MJJA	Dry season	Cl	10.732	8.31623	3.9002	9.00834	15.897	2
PM10B	MJJA	Dry season	EC	86.7758	59.8895	38.7485	67.1741	110.652	2
PM10B	MJJA	Dry season	Erythritol	1.0334	0.601055	0.625477	0.899237	1.2611	3
PM10B	MJJA	Dry season	F	1.91542	1.15299	1.04875	1.7167	2.42829	3
PM10B	MJJA	Dry season	For	12.8271	11.249	6.85651	9.8016	11.9013	15
PM10B	MJJA	Dry season	Galactosan	8.24899	10.5431	1.68853	4.80611	6.50777	10
PM10B	MJJA	Dry season	Glucose	2.44301	1.09726	1.56893	2.52674	3.1776	4
PM10B	MJJA	Dry season	Glycerol	3.81087	1.84423	2.11885	4.42526	5.14012	13
PM10B	MJJA	Dry season	Inositol	0.5949	0.276646	0.353318	0.693144	0.747537	10
PM10B	MJJA	Dry season	K	45.0194	39.6217	12.1018	41.1495	63.4919	2
PM10B	MJJA	Dry season	Levoglucosan	48.5333	50.4294	8.60011	32.6989	68.2408	6
PM10B	MJJA	Dry season	Li	0.00553073	0.00613814	0.00277765	0.00407229	0.00497222	15
PM10B	MJJA	Dry season	MSA	7.46396	2.98589	5.8457	6.88498	8.36229	2
PM10B	MJJA	Dry season	Mannitol	1.5979	0.670399	1.12369	1.60514	2.00223	4
PM10B	MJJA	Dry season	Mannosan	10.4832	12.0757	2.7057	7.67702	8.68608	10
PM10B	MJJA	Dry season	Mg	6.00881	3.37179	3.93359	4.92476	7.57886	2
PM10B	MJJA	Dry season	NH4	319.013	157.466	173.087	388.108	440.889	2
PM10B	MJJA	Dry season	NO3	161.268	136.92	57.2822	113.18	233.529	2
PM10B	MJJA	Dry season	Na	23.6974	12.0366	15.1702	21.3761	32.8942	3
PM10B	MJJA	Dry season	OC	914.154	601.346	467.47	795.053	1127.05	2
PM10B	MJJA	Dry season	Ox	36.4391	29.1972	13.3095	31.2036	54.6059	2
PM10B	MJJA	Dry season	Rhamnose	0.634166	0.547817	0.440484	0.634166	0.827849	21
PM10B	MJJA	Dry season	SO4	906.611	609.115	427.385	930.671	1262.4	0
PM10B	MJJA	Dry season	Sorbitol	6.61499	3.27386	4.18265	6.93021	8.74625	13
PM10B	MJJA	Dry season	Threalose	1.55476	0.691705	1.04338	1.65283	2.08188	16
PM10B	MJJA	Dry season	Xylitol						23
PM10B	SON	Dry-to-wet transition	Arabitol	0.963771	0.264192	0.790156	0.958325	1.1552	2
PM10B	SON	Dry-to-wet transition	Br	2.68751	2.10923	1.70606	2.71693	2.82212	1
PM10B	SON	Dry-to-wet transition	Ca	98.5451	54.3743	53.9883	82.037	135.601	0
PM10B	SON	Dry-to-wet transition	Cl	16.8167	19.2531	5.56257	8.71035	16.5447	2
PM10B	SON	Dry-to-wet transition	EC	131.6	99.4488	63.5552	97.1858	152.632	0
PM10B	SON	Dry-to-wet transition	Erythritol	1.14716	0.791299	0.654251	1.03113	1.45729	1
PM10B	SON	Dry-to-wet transition	F	1.86132	1.2961	1.12233	1.70011	2.11095	1
PM10B	SON	Dry-to-wet transition	For	149.213	190.608	81.8226	149.213	216.603	8
PM10B	SON	Dry-to-wet transition	Galactosan	2.14659	1.6612	0.967568	2.18556	2.52679	0
PM10B	SON	Dry-to-wet transition	Glucose	4.19083	2.03236	2.56822	4.15351	5.25063	0
PM10B	SON	Dry-to-wet transition	Glycerol	4.57485	2.19699	2.96662	3.87828	5.98468	3
PM10B	SON	Dry-to-wet transition	Inositol	0.592214	0.253007	0.443808	0.566499	0.715071	2
PM10B	SON	Dry-to-wet transition	K	53.6406	20.6264	48.7208	55.1612	60.7292	0
PM10B	SON	Dry-to-wet transition	Levoglucosan	31.6505	21.6836	19.1827	31.7515	36.6158	0
PM10B	SON	Dry-to-wet transition	Li	0.0482805	0.0454582	0.0222104	0.0274543	0.0639375	7
PM10B	SON	Dry-to-wet transition	MSA	8.05788	2.69968	6.19192	7.7645	9.0636	0
PM10B	SON	Dry-to-wet transition	Mannitol	2.00756	0.951542	1.25554	1.94978	2.48041	1
PM10B	SON	Dry-to-wet transition	Mannosan	3.81894	2.66842	2.04591	4.00915	4.14751	1
PM10B	SON	Dry-to-wet transition	Mg	14.4132	10.2402	6.23881	9.47927	22.0348	0
PM10B	SON	Dry-to-wet transition	NH4	533.476	179.343	489.246	552.364	646.84	0
PM10B	SON	Dry-to-wet transition	NO3	123.96	76.96	70.199	91.6316	158.093	1
PM10B	SON	Dry-to-wet transition	Na	56.6379	40.8644	28.4136	47.4526	63.1474	0
PM10B	SON	Dry-to-wet transition	OC	1360.45	542.51	939.289	1255.67	1856.97	0
PM10B	SON	Dry-to-wet transition	Ox	78.2688	47.526	60.5786	76.1527	96.1935	1
PM10B	SON	Dry-to-wet transition	Rhamnose						10
PM10B	SON	Dry-to-wet transition	SO4	1916.93	792.449	1493.22	1994.87	2539.87	0
PM10B	SON	Dry-to-wet transition	Sorbitol	8.04354	3.65393	5.93879	6.18617	9.21961	7
PM10B	SON	Dry-to-wet transition	Threalose	4.19374		4.19374	4.19374	4.19374	9
PM10B	SON	Dry-to-wet transition	Xylitol						10
PM10C	A	Wet-to-dry transition	Arabitol	0.688666	0.0969012	0.654406	0.688666	0.722926	2
PM10C	A	Wet-to-dry transition	Br	0.614569	0.268946	0.437421	0.636609	0.813756	0
PM10C	A	Wet-to-dry transition	Ca	40.0018	18.1213	30.1259	41.4506	51.3265	0
PM10C	A	Wet-to-dry transition	Cl	1.10204	1.20526	0.406695	0.453076	1.4729	1
PM10C	A	Wet-to-dry transition	EC	66.3083	36.1758	41.0896	61.4659	86.6847	0
PM10C	A	Wet-to-dry transition	Erythritol						4
PM10C	A	Wet-to-dry transition	F						4
PM10C	A	Wet-to-dry transition	For	2.62921	0.510988	2.44855	2.62921	2.80987	2
PM10C	A	Wet-to-dry transition	Galactosan						4
PM10C	A	Wet-to-dry transition	Glucose	1.55907	0.931503	1.08301	1.51636	2.01378	1
PM10C	A	Wet-to-dry transition	Glycerol	5.15192		5.15192	5.15192	5.15192	3
PM10C	A	Wet-to-dry transition	Inositol	0.802734	0.256687	0.596745	0.77953	0.98552	0
PM10C	A	Wet-to-dry transition	K	17.9254	9.51119	12.342	15.8885	21.4719	0
PM10C	A	Wet-to-dry transition	Levoglucosan						4
PM10C	A	Wet-to-dry transition	Li	0.0147278	0.0109296	0.0066432	0.0116082	0.0196928	0
PM10C	A	Wet-to-dry transition	MSA	5.0113	1.8165	4.25839	5.55675	6.30966	0
PM10C	A	Wet-to-dry transition	Mannitol	0.871687	0.0730406	0.845863	0.871687	0.897511	2
PM10C	A	Wet-to-dry transition	Mannosan						4
PM10C	A	Wet-to-dry transition	Mg	6.11687	3.46676	3.9286	5.50768	7.69595	0
PM10C	A	Wet-to-dry transition	NH4	405.628	233.25	302.282	360.568	463.913	0
PM10C	A	Wet-to-dry transition	NO3	39.6053	17.6779	26.6765	34.3076	47.2364	0
PM10C	A	Wet-to-dry transition	Na	11.746	6.53076	7.81038	12.7987	16.7342	0
PM10C	A	Wet-to-dry transition	OC	511.958	204.725	355.747	481.9	638.111	0
PM10C	A	Wet-to-dry transition	Ox	59.8325	37.9879	38.1973	44.4388	66.074	0
PM10C	A	Wet-to-dry transition	Rhamnose						4
PM10C	A	Wet-to-dry transition	SO4	1186.29	602.1	848.571	1088.53	1426.25	0
PM10C	A	Wet-to-dry transition	Sorbitol						4
PM10C	A	Wet-to-dry transition	Threalose	0.499757	0.0709652	0.474667	0.499757	0.524847	2
PM10C	A	Wet-to-dry transition	Xylitol						4
PM10C	DJFM	Wet season	Arabitol	0.676811	0.631168	0.24622	0.5154	0.809898	5
PM10C	DJFM	Wet season	Br	0.607152	0.615794	0.180941	0.242728	1.04007	2
PM10C	DJFM	Wet season	Ca	22.6873	16.0134	11.3407	17.3073	30.9017	0
PM10C	DJFM	Wet season	Cl	0.560756	0.560711	0.154921	0.373943	0.835033	4
PM10C	DJFM	Wet season	EC	37.7815	22.5274	25.2242	36.1323	46.7578	0
PM10C	DJFM	Wet season	Erythritol						11
PM10C	DJFM	Wet season	F	0.04813	0.0684124	0.0174573	0.0190791	0.0192428	6
PM10C	DJFM	Wet season	For	2.2323	2.07016	0.822502	1.46995	2.81336	3
PM10C	DJFM	Wet season	Galactosan	0.0884228	0.0497181	0.0708448	0.0884228	0.106001	9
PM10C	DJFM	Wet season	Glucose	1.992	1.53766	1.01176	1.5872	2.43001	3
PM10C	DJFM	Wet season	Glycerol	8.28614	8.83596	3.6922	4.09706	7.38728	6
PM10C	DJFM	Wet season	Inositol	0.570364	0.243299	0.415962	0.600769	0.668707	2
PM10C	DJFM	Wet season	K	8.04454	6.46317	3.71778	6.10464	9.24259	1
PM10C	DJFM	Wet season	Levoglucosan	2.76371	1.94805	1.04752	2.44571	4.17065	6
PM10C	DJFM	Wet season	Li	0.0143267	0.00672043	0.0132252	0.0133742	0.0156021	2
PM10C	DJFM	Wet season	MSA	3.78007	3.52605	0.991019	1.93376	6.55324	0
PM10C	DJFM	Wet season	Mannitol	1.69389	1.20728	0.86742	1.79865	1.92093	6
PM10C	DJFM	Wet season	Mannosan	0.167434	0.0718629	0.142027	0.167434	0.192841	9
PM10C	DJFM	Wet season	Mg	4.49043	2.37683	2.9503	5.2031	6.30247	0
PM10C	DJFM	Wet season	NH4	201.905	118.464	114.987	229.201	245.021	0
PM10C	DJFM	Wet season	NO3	13.9072	12.7896	6.49168	9.09663	17.0827	3
PM10C	DJFM	Wet season	Na	8.18069	6.23426	2.9059	8.9488	11.5895	0
PM10C	DJFM	Wet season	OC	310.95	164.253	226.021	289.822	327.78	0
PM10C	DJFM	Wet season	Ox	39.0195	18.5205	23.8587	42.2239	54.2784	0
PM10C	DJFM	Wet season	Rhamnose						11
PM10C	DJFM	Wet season	SO4	659.132	354.88	493.153	659.413	862.638	0
PM10C	DJFM	Wet season	Sorbitol	3.77346	2.34214	2.79167	3.87468	4.85647	7
PM10C	DJFM	Wet season	Threalose	0.654199	0.659053	0.421188	0.654199	0.887209	9
PM10C	DJFM	Wet season	Xylitol						11
PM10C	MJJA	Dry season	Arabitol	0.504641	0.257349	0.267585	0.431421	0.708211	3
PM10C	MJJA	Dry season	Br	1.29595	0.916746	0.74269	0.83488	1.59004	1
PM10C	MJJA	Dry season	Ca	78.4593	45.8943	45.1023	78.092	103.131	0
PM10C	MJJA	Dry season	Cl	5.73312	3.70052	2.58669	5.63056	6.61465	1
PM10C	MJJA	Dry season	EC	86.6124	59.0958	48.0659	70.1593	96.7696	0
PM10C	MJJA	Dry season	Erythritol	0.901568	0.494238	0.507539	0.82738	1.22141	11
PM10C	MJJA	Dry season	F	0.355097	0.419479	0.037149	0.132142	0.424436	6
PM10C	MJJA	Dry season	For	2.73151	1.50287	1.7847	2.03683	3.90089	0
PM10C	MJJA	Dry season	Galactosan	1.27369	0.955188	0.726816	1.05605	1.51196	4
PM10C	MJJA	Dry season	Glucose	1.89499	0.930332	1.40757	1.95368	2.42017	5
PM10C	MJJA	Dry season	Glycerol	2.34653	0.360582	2.16672	2.25854	2.43835	11
PM10C	MJJA	Dry season	Inositol	0.855108	0.332516	0.550877	0.922687	1.0913	1
PM10C	MJJA	Dry season	K	39.8944	31.261	20.036	28.1822	49.1874	0
PM10C	MJJA	Dry season	Levoglucosan	15.21	11.3501	6.13476	14.87	18.2104	3
PM10C	MJJA	Dry season	Li	0.0179798	0.0148471	0.00679161	0.0127586	0.0309638	3
PM10C	MJJA	Dry season	MSA	5.22331	1.53302	4.44513	5.20457	6.05454	0
PM10C	MJJA	Dry season	Mannitol	0.771262	0.499479	0.412473	0.502105	1.07841	10
PM10C	MJJA	Dry season	Mannosan	1.64131	1.36839	0.750649	1.28967	1.85141	4
PM10C	MJJA	Dry season	Mg	8.88105	5.95802	5.37594	6.75106	11.2643	0
PM10C	MJJA	Dry season	NH4	317.788	152.572	233.208	299.613	344.212	0
PM10C	MJJA	Dry season	NO3	65.5952	54.7827	14.4124	55.4879	118.741	0
PM10C	MJJA	Dry season	Na	16.0784	12.9381	6.78003	11.0018	21.9633	1
PM10C	MJJA	Dry season	OC	846.071	533.187	487.439	708.952	1025.44	0
PM10C	MJJA	Dry season	Ox	59.7466	37.3842	36.2395	43.6632	75.3257	0
PM10C	MJJA	Dry season	Rhamnose						15
PM10C	MJJA	Dry season	SO4	1060.61	516.709	803.643	903.023	1271.36	0
PM10C	MJJA	Dry season	Sorbitol						15
PM10C	MJJA	Dry season	Threalose	0.48274	0.260092	0.292694	0.350281	0.618544	8
PM10C	MJJA	Dry season	Xylitol						15
PM10C	SON	Dry-to-wet transition	Arabitol	0.382035	0.213926	0.3064	0.382035	0.457669	0
PM10C	SON	Dry-to-wet transition	Br	0.713128		0.713128	0.713128	0.713128	1
PM10C	SON	Dry-to-wet transition	Ca	29.7496	11.7578	25.5926	29.7496	33.9066	0
PM10C	SON	Dry-to-wet transition	Cl	1.54698		1.54698	1.54698	1.54698	1
PM10C	SON	Dry-to-wet transition	EC	62.0763	3.01578	61.01	62.0763	63.1425	0
PM10C	SON	Dry-to-wet transition	Erythritol						2
PM10C	SON	Dry-to-wet transition	F						2
PM10C	SON	Dry-to-wet transition	For	2.92313	1.00084	2.56928	2.92313	3.27698	0
PM10C	SON	Dry-to-wet transition	Galactosan	1.11404		1.11404	1.11404	1.11404	1
PM10C	SON	Dry-to-wet transition	Glucose	1.08486	0.289195	0.982611	1.08486	1.1871	0
PM10C	SON	Dry-to-wet transition	Glycerol						2
PM10C	SON	Dry-to-wet transition	Inositol	1.32783	0.0592273	1.30689	1.32783	1.34877	0
PM10C	SON	Dry-to-wet transition	K	23.0577	3.37657	21.8639	23.0577	24.2515	0
PM10C	SON	Dry-to-wet transition	Levoglucosan	6.29148	1.80383	5.65373	6.29148	6.92923	0
PM10C	SON	Dry-to-wet transition	Li	0.00446255	0.000577583	0.00425834	0.00446255	0.00466675	0
PM10C	SON	Dry-to-wet transition	MSA	2.36955	0.539894	2.17867	2.36955	2.56043	0
PM10C	SON	Dry-to-wet transition	Mannitol	1.13188		1.13188	1.13188	1.13188	1
PM10C	SON	Dry-to-wet transition	Mannosan	0.893619		0.893619	0.893619	0.893619	1
PM10C	SON	Dry-to-wet transition	Mg	3.05095	0.380784	2.91633	3.05095	3.18558	0
PM10C	SON	Dry-to-wet transition	NH4	186.704	14.1045	181.717	186.704	191.69	0
PM10C	SON	Dry-to-wet transition	NO3	29.6086	0.54253	29.4168	29.6086	29.8004	0
PM10C	SON	Dry-to-wet transition	Na	5.66525	2.07678	4.931	5.66525	6.39951	0
PM10C	SON	Dry-to-wet transition	OC	633.886	97.3161	599.48	633.886	668.292	0
PM10C	SON	Dry-to-wet transition	Ox	68.1235	18.5223	61.5749	68.1235	74.6721	0
PM10C	SON	Dry-to-wet transition	Rhamnose						2
PM10C	SON	Dry-to-wet transition	SO4	521.306	21.6657	513.646	521.306	528.966	0
PM10C	SON	Dry-to-wet transition	Sorbitol						2
PM10C	SON	Dry-to-wet transition	Threalose	1.14258	0.417551	0.994952	1.14258	1.2902	0
PM10C	SON	Dry-to-wet transition	Xylitol						2
PM2.5	A	Wet-to-dry transition	Arabitol	1.46275	0.213267	1.38735	1.46275	1.53816	4
PM2.5	A	Wet-to-dry transition	Br	0.463023	0.237593	0.286886	0.391871	0.518089	1
PM2.5	A	Wet-to-dry transition	Ca	67.1812	51.0027	41.968	57.9875	66.6118	0
PM2.5	A	Wet-to-dry transition	Cl	17.5083		17.5083	17.5083	17.5083	5
PM2.5	A	Wet-to-dry transition	EC	73.5167	57.4157	33.5992	69.3855	118.566	0
PM2.5	A	Wet-to-dry transition	Erythritol						6
PM2.5	A	Wet-to-dry transition	F	1.8841	2.23716	0.805951	1.18162	1.40386	0
PM2.5	A	Wet-to-dry transition	For	14.3438	1.26835	13.8954	14.3438	14.7922	4
PM2.5	A	Wet-to-dry transition	Galactosan						6
PM2.5	A	Wet-to-dry transition	Glucose	3.8982	0.745854	3.6345	3.8982	4.1619	4
PM2.5	A	Wet-to-dry transition	Glycerol						6
PM2.5	A	Wet-to-dry transition	Inositol	0.451682		0.451682	0.451682	0.451682	5
PM2.5	A	Wet-to-dry transition	K	11.7973	9.03867	5.00593	10.8982	16.7402	0
PM2.5	A	Wet-to-dry transition	Levoglucosan	2.01048	1.3415	1.19747	1.89197	2.70498	2
PM2.5	A	Wet-to-dry transition	Li	0.0188665	0.00201764	0.0181532	0.0188665	0.0195799	4
PM2.5	A	Wet-to-dry transition	MSA	5.62766	2.88319	4.2669	6.65609	7.45307	0
PM2.5	A	Wet-to-dry transition	Mannitol	2.54754	1.00727	2.19142	2.54754	2.90367	4
PM2.5	A	Wet-to-dry transition	Mannosan	0.0728798		0.0728798	0.0728798	0.0728798	5
PM2.5	A	Wet-to-dry transition	Mg	5.00903	4.18418	1.64978	3.30724	8.5516	0
PM2.5	A	Wet-to-dry transition	NH4	349.333	247.096	165.934	351.338	540.259	0
PM2.5	A	Wet-to-dry transition	NO3	84.6956	130.905	15.2422	42.8041	54.8405	0
PM2.5	A	Wet-to-dry transition	Na	18.3675	9.53856	13.7128	16.7329	21.3876	2
PM2.5	A	Wet-to-dry transition	OC	574.698	357.497	402.129	507.519	632.819	0
PM2.5	A	Wet-to-dry transition	Ox	48.0157	33.587	29.4674	40.0859	63.6176	0
PM2.5	A	Wet-to-dry transition	Rhamnose						6
PM2.5	A	Wet-to-dry transition	SO4	1071.23	854.723	410.621	1028.29	1679.8	0
PM2.5	A	Wet-to-dry transition	Sorbitol	9.03594	3.80282	7.48422	10.1746	11.157	3
PM2.5	A	Wet-to-dry transition	Threalose	0.979079		0.979079	0.979079	0.979079	5
PM2.5	A	Wet-to-dry transition	Xylitol						6
PM2.5	DJFM	Wet season	Arabitol	0.674172	0.45453	0.47085	0.758213	0.919514	8
PM2.5	DJFM	Wet season	Br	1.74053	1.5539	0.59419	1.56043	2.70677	7
PM2.5	DJFM	Wet season	Ca	28.4554	22.4648	8.50129	20.5715	42.1646	0
PM2.5	DJFM	Wet season	Cl	4.53676		4.53676	4.53676	4.53676	10
PM2.5	DJFM	Wet season	EC	51.5845	30.9463	24.8471	54.6261	73.2229	3
PM2.5	DJFM	Wet season	Erythritol						11
PM2.5	DJFM	Wet season	F	0.911087	0.559094	0.51484	0.602505	1.05968	2
PM2.5	DJFM	Wet season	For	9.16355		9.16355	9.16355	9.16355	10
PM2.5	DJFM	Wet season	Galactosan	0.320028		0.320028	0.320028	0.320028	10
PM2.5	DJFM	Wet season	Glucose	2.84073	1.34735	1.79415	2.80969	3.85627	7
PM2.5	DJFM	Wet season	Glycerol						11
PM2.5	DJFM	Wet season	Inositol	0.389624		0.389624	0.389624	0.389624	10
PM2.5	DJFM	Wet season	K	8.13596	5.7022	3.29128	6.38594	12.5051	2
PM2.5	DJFM	Wet season	Levoglucosan	2.8015	2.8845	0.643183	2.43896	3.3475	6
PM2.5	DJFM	Wet season	Li	0.0259265	0.00489891	0.0241944	0.0259265	0.0276585	9
PM2.5	DJFM	Wet season	MSA	3.60988	2.66442	1.90783	2.88953	4.92525	3
PM2.5	DJFM	Wet season	Mannitol	1.85881	0.995982	1.52123	2.32752	2.43074	8
PM2.5	DJFM	Wet season	Mannosan	0.646347		0.646347	0.646347	0.646347	10
PM2.5	DJFM	Wet season	Mg	3.74957	3.07781	0.58336	4.51823	5.42988	2
PM2.5	DJFM	Wet season	NH4	139.315	184.985	41.2033	56.7501	122.824	1
PM2.5	DJFM	Wet season	NO3	38.4969	32.1653	23.3028	28.4867	38.6443	2
PM2.5	DJFM	Wet season	Na	16.4958	10.6807	9.89068	13.3877	17.5768	4
PM2.5	DJFM	Wet season	OC	490.586	367.465	259.402	404.733	552.006	1
PM2.5	DJFM	Wet season	Ox	27.3214	18.2283	10.418	25.182	43.3265	0
PM2.5	DJFM	Wet season	Rhamnose						11
PM2.5	DJFM	Wet season	SO4	512.63	690.852	57.7393	279.628	485.129	1
PM2.5	DJFM	Wet season	Sorbitol	5.48672	1.35785	4.60854	5.73061	6.60879	7
PM2.5	DJFM	Wet season	Threalose	1.0812		1.0812	1.0812	1.0812	10
PM2.5	DJFM	Wet season	Xylitol						11
PM2.5	MJJA	Dry season	Arabitol	1.79109	0.895272	1.07059	1.68343	2.00086	17
PM2.5	MJJA	Dry season	Br	1.14678	0.723056	0.65667	0.818061	1.49273	3
PM2.5	MJJA	Dry season	Ca	128.184	97.279	72.4284	110.913	132.63	1
PM2.5	MJJA	Dry season	Cl	14.7002	12.5954	5.77913	10.7043	20.753	7
PM2.5	MJJA	Dry season	EC	90.0696	46.3878	56.0541	81.7288	123.394	3
PM2.5	MJJA	Dry season	Erythritol	1.19462	0.410079	1.04964	1.19462	1.33961	33
PM2.5	MJJA	Dry season	F	3.63997	2.82077	1.56527	2.87559	4.43601	2
PM2.5	MJJA	Dry season	For	13.9897	6.74039	9.40663	12.0175	15.8679	11
PM2.5	MJJA	Dry season	Galactosan	2.15556	3.0692	0.429036	0.970335	1.99657	12
PM2.5	MJJA	Dry season	Glucose	4.00049	3.52098	1.82088	3.09432	4.54378	14
PM2.5	MJJA	Dry season	Glycerol						35
PM2.5	MJJA	Dry season	Inositol	0.42605	0.171267	0.322195	0.376134	0.465974	24
PM2.5	MJJA	Dry season	K	33.4252	19.434	20.7233	29.9998	41.4453	1
PM2.5	MJJA	Dry season	Levoglucosan	19.9272	25.3892	4.11938	9.08291	23.1886	2
PM2.5	MJJA	Dry season	Li	0.0233203	0.0156687	0.0137441	0.0172051	0.0289419	9
PM2.5	MJJA	Dry season	MSA	8.6024	3.82056	5.90153	7.78359	10.4127	1
PM2.5	MJJA	Dry season	Mannitol	1.61283	0.902173	0.917536	1.42438	2.07351	15
PM2.5	MJJA	Dry season	Mannosan	2.82274	4.24343	0.571879	0.889289	2.94023	11
PM2.5	MJJA	Dry season	Mg	10.5776	6.11759	6.40608	8.50408	13.5225	2
PM2.5	MJJA	Dry season	NH4	353.41	194.223	215.523	314.545	428.6	1
PM2.5	MJJA	Dry season	NO3	86.9206	62.0113	37.6752	67.0506	117.541	2
PM2.5	MJJA	Dry season	Na	26.3464	15.4359	14.7054	24.9361	31.524	2
PM2.5	MJJA	Dry season	OC	1044.03	964.965	584.888	814.033	1132.62	2
PM2.5	MJJA	Dry season	Ox	39.9265	23.9016	27.3047	40.0566	52.3982	4
PM2.5	MJJA	Dry season	Rhamnose						35
PM2.5	MJJA	Dry season	SO4	1360.13	891.894	759.353	1346.65	1666.1	0
PM2.5	MJJA	Dry season	Sorbitol	7.50241	3.57586	4.53228	6.71197	8.9061	20
PM2.5	MJJA	Dry season	Threalose	1.56711	1.1201	0.969917	1.28207	1.61881	24
PM2.5	MJJA	Dry season	Xylitol						35
PM2.5	SON	Dry-to-wet transition	Arabitol	1.71938	0.879579	1.19795	1.45522	1.79696	7
PM2.5	SON	Dry-to-wet transition	Br	1.25645	0.750454	0.854492	1.10247	1.37132	0
PM2.5	SON	Dry-to-wet transition	Ca	75.0551	42.341	42.939	72.9912	96.3949	0
PM2.5	SON	Dry-to-wet transition	Cl	10.9321	7.65608	6.42209	8.01805	11.3536	13
PM2.5	SON	Dry-to-wet transition	EC	79.7379	51.7888	43.9607	63.4654	97.471	0
PM2.5	SON	Dry-to-wet transition	Erythritol	0.925503		0.925503	0.925503	0.925503	27
PM2.5	SON	Dry-to-wet transition	F	2.60567	2.10819	1.22159	1.77018	3.36125	0
PM2.5	SON	Dry-to-wet transition	For	13.7456	7.76669	8.00423	11.1094	15.4913	5
PM2.5	SON	Dry-to-wet transition	Galactosan	0.682853	0.497605	0.347925	0.517047	0.976375	4
PM2.5	SON	Dry-to-wet transition	Glucose	3.5297	1.84421	2.23093	2.69037	4.95062	7
PM2.5	SON	Dry-to-wet transition	Glycerol						28
PM2.5	SON	Dry-to-wet transition	Inositol	0.342292	0.0531611	0.317981	0.350432	0.370673	25
PM2.5	SON	Dry-to-wet transition	K	26.9947	13.6374	17.5749	23.6792	35.5256	0
PM2.5	SON	Dry-to-wet transition	Levoglucosan	11.4557	7.13094	6.13199	10.0645	16.3445	0
PM2.5	SON	Dry-to-wet transition	Li	0.0438168	0.0459242	0.0265732	0.0375176	0.0462504	6
PM2.5	SON	Dry-to-wet transition	MSA	8.64868	5.00715	5.88878	7.57644	11.0643	0
PM2.5	SON	Dry-to-wet transition	Mannitol	1.64417	1.62111	0.930637	1.15153	1.46454	10
PM2.5	SON	Dry-to-wet transition	Mannosan	1.43167	3.05866	0.317041	0.796137	1.2521	4
PM2.5	SON	Dry-to-wet transition	Mg	8.65451	4.22704	6.29502	8.62113	11.4321	1
PM2.5	SON	Dry-to-wet transition	NH4	296.765	149.037	176.009	288.302	382.621	0
PM2.5	SON	Dry-to-wet transition	NO3	97.4801	92.2591	48.4511	79.0991	101.452	0
PM2.5	SON	Dry-to-wet transition	Na	27.128	16.537	15.2509	21.3594	37.8667	1
PM2.5	SON	Dry-to-wet transition	OC	893.856	461.607	489.187	826.968	1114.96	0
PM2.5	SON	Dry-to-wet transition	Ox	54.2539	37.0765	26.7059	46.2938	68.8585	0
PM2.5	SON	Dry-to-wet transition	Rhamnose						28
PM2.5	SON	Dry-to-wet transition	SO4	1050.98	558.994	657.799	922.553	1233.96	0
PM2.5	SON	Dry-to-wet transition	Sorbitol	19.7288	9.08013	12.9507	24.1844	26.5873	21
PM2.5	SON	Dry-to-wet transition	Threalose	1.382	0.634092	0.926161	1.06438	1.77737	20
PM2.5	SON	Dry-to-wet transition	Xylitol						28

## Sheet: bulk_concentrations_ambient
Chacaltaya data in ambient (534 hPa, 0ºC) conditions (ng/m3)
Statistics for each of the PM10 groups
PM group	N	Time period
PM10-A	59	December 2011 to July 2013
PM10-B	52	April 2016 to August 2017
PM10-C	32	February 2019 to March 2020				N= number of samples
PM2.5	80	August 2013 to December 2015				QL= quantification limit
PM group	Species	Mean	Std_dev	p25	Median	p75	N<QL
PM10A	Arabitol	2.02696	2.32133	0.817066	1.41491	2.44113	1
PM10A	Br	0.771671	0.492889	0.389945	0.679234	1.01339	9
PM10A	Ca	38.8785	23.0979	21.2045	35.6843	50.8128	4
PM10A	Cl	4.58229	3.72023	1.92184	3.23865	5.59813	12
PM10A	EC	49.3876	48.314	18.1116	36.31	59.4939	23
PM10A	F	1.08117	1.22018	0.4313	0.784734	1.28704	10
PM10A	For	6.51512	5.68181	2.84281	4.66993	8.52645	11
PM10A	Galactosan	1.05589	2.60879	0.119796	0.405377	0.696188	36
PM10A	Glucose	1.74749	1.11363	1.12538	1.40214	1.94425	5
PM10A	K	12.9831	12.2287	5.38174	9.4854	15.3914	5
PM10A	Levoglucosan	6.74301	12.1029	1.06881	2.82722	7.03922	3
PM10A	Li	0.0283113	0.0375094	0.00990292	0.0200473	0.0342937	11
PM10A	MSA	3.48982	1.88896	2.1702	3.53646	4.66686	5
PM10A	Mannitol	0.724994	0.578594	0.450847	0.574981	0.795669	10
PM10A	Mannosan	1.54692	2.89993	0.298465	0.524411	1.38163	42
PM10A	Mg	3.85298	2.38613	2.10033	3.61281	5.33942	3
PM10A	NH4	83.965	56.332	42.0204	76.9293	116.875	1
PM10A	NO3	78.81	60.3758	26.9224	67.6036	115.714	1
PM10A	Na	13.4803	11.1217	5.13062	11.707	17.0947	5
PM10A	OC	482.765	342.537	271.801	371.353	662.199	3
PM10A	Ox	17.4285	21.6608	1.93898	12.0054	25.9056	2
PM10A	SO4	241.146	174.791	109.574	213.608	347.092	1
PM10A	Sorbitol	0.128496	0.101056	0.0710019	0.0881915	0.165838	56
PM10B	Arabitol	0.561208	0.174378	0.451579	0.519919	0.628291	21
PM10B	Br	0.867355	0.81912	0.2136	0.578964	1.40911	14
PM10B	Ca	30.867	23.0792	14.4322	27.575	39.308	4
PM10B	Cl	5.6975	6.2548	1.49053	4.05802	6.39491	18
PM10B	EC	41.3564	36.548	18.5437	30.0842	53.2574	3
PM10B	Erythritol	0.520145	0.343344	0.298609	0.409959	0.662376	17
PM10B	F	0.785231	0.619341	0.340271	0.59523	1.10862	10
PM10B	For	14.6599	36.6524	3.24072	5.21154	6.77842	36
PM10B	Galactosan	2.65899	4.2938	0.381379	1.24488	2.69315	26
PM10B	Glucose	1.54664	0.928354	0.870995	1.30565	1.94665	8
PM10B	Glycerol	2.07599	1.19485	1.00781	2.04143	3.04592	29
PM10B	Inositol	0.310615	0.137834	0.185506	0.339501	0.393859	28
PM10B	K	18.2825	18.2408	4.38462	8.29345	30.0218	5
PM10B	Levoglucosan	19.5395	21.9405	3.16325	14.1308	24.6817	20
PM10B	Li	0.0064611	0.0121067	0.00142296	0.00240879	0.00638217	33
PM10B	MSA	3.56822	1.83082	2.50497	3.2984	4.46842	4
PM10B	Mannitol	0.973698	0.550578	0.598227	0.857052	1.15759	12
PM10B	Mannosan	3.67155	5.04065	0.7662	2.15801	4.07229	27
PM10B	Mg	3.62983	3.52207	1.0791	2.66425	4.34743	3
PM10B	NH4	168.082	104.176	75.8752	162.637	242.148	3
PM10B	NO3	58.0792	61.1938	10.4261	37.56	83.5536	7
PM10B	Na	15.9909	14.3235	8.0782	12.1254	18.9125	11
PM10B	OC	423.401	319.522	193.267	320	579.547	3
PM10B	Ox	20.1727	19.8591	2.03363	16.0718	30.6918	7
PM10B	Rhamnose	0.337082	0.291185	0.234133	0.337082	0.440032	50
PM10B	SO4	530.327	407.244	186.793	492.192	737.874	0
PM10B	Sorbitol	5.01677	4.54952	2.92859	4.167	5.5762	28
PM10B	Threalose	0.946308	0.588247	0.55137	0.873429	1.19264	41
PM10B	Xylitol						52
PM10C	Arabitol	0.300262	0.203359	0.144068	0.273481	0.396256	10
PM10C	Br	0.509936	0.428206	0.237749	0.414013	0.567278	4
PM10C	Ca	27.6363	22.5664	9.97611	19.4363	39.1247	0
PM10C	Cl	1.87091	1.9598	0.237995	1.07221	3.1966	7
PM10C	EC	34.9996	25.8406	21.0472	27.3043	41.7929	0
PM10C	Erythritol	0.484167	0.26542	0.272563	0.444326	0.655931	28
PM10C	F	0.12973	0.192759	0.0101051	0.0394466	0.18338	18
PM10C	For	1.37722	0.837009	0.813111	1.17795	1.82058	5
PM10C	Galactosan	0.579902	0.499121	0.144475	0.553022	0.618719	18
PM10C	Glucose	0.963665	0.596337	0.539213	0.842768	1.2797	9
PM10C	Glycerol	2.94605	3.47081	1.2363	1.72348	2.57302	22
PM10C	Inositol	0.423854	0.180459	0.30231	0.445434	0.523418	3
PM10C	K	13.7685	14.0851	4.67807	10.6735	15.1909	1
PM10C	Levoglucosan	5.87172	5.67322	2.15457	3.61544	8.11549	13
PM10C	Li	0.00816159	0.00617609	0.00346211	0.00712198	0.00922928	5
PM10C	MSA	2.39821	1.31659	1.41454	2.56143	3.28926	0
PM10C	Mannitol	0.616127	0.460864	0.264567	0.486519	0.791512	19
PM10C	Mannosan	0.730177	0.699886	0.242403	0.583496	0.741948	18
PM10C	Mg	3.52406	2.58919	2.122	3.04906	3.63992	0
PM10C	NH4	149.14	85.2691	99.4969	131.788	181.35	0
PM10C	NO3	23.9256	24.216	5.41638	15.1164	33.7296	3
PM10C	Na	6.43573	5.49304	2.63257	4.9015	8.69283	1
PM10C	OC	320.9	237.226	158.126	279.822	381.146	0
PM10C	Ox	28.2044	16.8181	17.2253	23.1521	30.0189	0
PM10C	Rhamnose						32
PM10C	SO4	483.999	267.077	304.702	475.856	644.096	0
PM10C	Sorbitol	2.00132	1.2422	1.48061	2.05501	2.57572	28
PM10C	Threalose	0.324068	0.20055	0.158397	0.290611	0.447764	19
PM10C	Xylitol						32
PM2.5	Arabitol	0.897685	0.471612	0.594233	0.778796	1.04168	36
PM2.5	Br	0.627109	0.423537	0.34687	0.485633	0.759125	11
PM2.5	Ca	48.8046	42.1182	22.9921	40.02	61.6165	1
PM2.5	Cl	6.9762	5.78548	3.12027	5.14008	9.19691	35
PM2.5	EC	42.9317	25.8543	24.3565	37.0873	52.9472	6
PM2.5	Erythritol	0.59337	0.176668	0.491422	0.497021	0.647144	77
PM2.5	F	1.47831	1.31403	0.60221	0.944859	1.99491	4
PM2.5	For	7.33487	3.71855	4.74877	6.38977	8.30284	30
PM2.5	Galactosan	0.73271	1.19785	0.200814	0.303832	0.594492	32
PM2.5	Glucose	1.96167	1.40196	1.04184	1.61469	2.36613	32
PM2.5	Glycerol						80
PM2.5	Inositol	0.219211	0.0778753	0.174645	0.204875	0.236565	64
PM2.5	K	14.1684	9.54493	7.64277	12.4659	19.3841	3
PM2.5	Levoglucosan	7.63158	10.0778	1.87348	4.52554	9.17714	10
PM2.5	Li	0.0170511	0.0176855	0.00757357	0.0135751	0.0207735	28
PM2.5	MSA	4.1677	2.34011	2.74948	3.95156	5.38128	4
PM2.5	Mannitol	0.888688	0.654751	0.492267	0.719737	1.10401	37
PM2.5	Mannosan	1.09022	1.94372	0.184637	0.423833	0.795286	30
PM2.5	Mg	4.56012	2.91282	2.46133	4.16499	6.04744	5
PM2.5	NH4	162.194	101.767	86.8544	156.878	219.147	2
PM2.5	NO3	44.871	41.8725	17.941	34.6602	55.2514	4
PM2.5	Na	13.4766	8.21627	7.33255	10.7601	18.0493	9
PM2.5	OC	465.664	385.258	256.263	353.771	585.55	3
PM2.5	Ox	23.3565	16.1907	11.7268	21.38	28.5219	4
PM2.5	Rhamnose						80
PM2.5	SO4	599.96	425.304	277.99	559.961	819.758	1
PM2.5	Sorbitol	5.48095	3.9401	2.57437	3.57713	6.43835	51
PM2.5	Threalose	0.763839	0.471263	0.490634	0.619665	0.894327	59
PM2.5	Xylitol						80

## Sheet: seasonal_concentrations_ambient
Chacaltaya data in ambient conditions (ng/m3)
Statistics for the each season within every PM10 group
				Number of samples
PM group	Time period		Wet-to-dry season	Wet season	Dry season	Dry-to-wet season
PM10-A	December 2011 to July 2013		5	17	23	14
PM10-B	April 2016 to August 2017		5	14	23	10
PM10-C	February 2019 to March 2020		4	11	15	2		N= number of samples
PM2.5	August 2013 to December 2015		6	11	35	28		QL= quantification limit
PM group	Months	Season	Species	Mean	Std_dev	p25	Median	p75	N<QL
PM10A	A	Wet-to-dry transition	Arabitol	1.24771	0.623696	0.831377	1.01345	1.26473	0
PM10A	A	Wet-to-dry transition	Br	0.36433	0.185413	0.225769	0.416188	0.466211	0
PM10A	A	Wet-to-dry transition	Ca	22.0633	15.2666	11.0193	18.8678	35.6843	0
PM10A	A	Wet-to-dry transition	Cl	2.92894	0.929235	2.36606	2.85244	3.41533	1
PM10A	A	Wet-to-dry transition	EC	39.062	6.33701	36.8215	39.062	41.3025	3
PM10A	A	Wet-to-dry transition	F	0.491917	0.249137	0.29022	0.422658	0.751619	0
PM10A	A	Wet-to-dry transition	For	2.7197	0.771517	2.35462	2.84873	3.21381	1
PM10A	A	Wet-to-dry transition	Galactosan	0.0744506	0.0296674	0.0639616	0.0744506	0.0849396	3
PM10A	A	Wet-to-dry transition	Glucose	1.25179	0.327641	0.982729	1.29402	1.42314	0
PM10A	A	Wet-to-dry transition	K	5.68298	3.73497	2.77387	4.5842	7.83139	0
PM10A	A	Wet-to-dry transition	Levoglucosan	1.39958	0.608627	1.07545	1.187	1.205	0
PM10A	A	Wet-to-dry transition	Li	0.0141638	0.00903386	0.0109699	0.0141638	0.0173578	3
PM10A	A	Wet-to-dry transition	MSA	5.04069	1.8529	4.29874	4.58312	5.88647	0
PM10A	A	Wet-to-dry transition	Mannitol	0.412231	0.119697	0.387737	0.422104	0.465665	0
PM10A	A	Wet-to-dry transition	Mannosan						0
PM10A	A	Wet-to-dry transition	Mg	2.97454	2.71556	0.968358	1.71686	4.46041	0
PM10A	A	Wet-to-dry transition	NH4	83.4153	43.8742	54.8272	59.477	122.542	0
PM10A	A	Wet-to-dry transition	NO3	66.6351	27.2298	58.09	79.825	82.9136	0
PM10A	A	Wet-to-dry transition	Na	12.1387	6.52872	9.46693	13.9902	16.662	1
PM10A	A	Wet-to-dry transition	OC	328.294	60.1116	280.107	312.467	349.609	0
PM10A	A	Wet-to-dry transition	Ox	11.9628	11.0988	0.961437	12.0054	22.8089	0
PM10A	A	Wet-to-dry transition	SO4	220.981	148.316	114.402	129.24	347.605	0
PM10A	DJFM	Wet season	Arabitol	1.46523	0.9462	0.814911	1.16378	1.49993	0
PM10A	DJFM	Wet season	Br	0.45937	0.583605	0.218626	0.27583	0.366483	8
PM10A	DJFM	Wet season	Ca	20.9765	16.1579	11.3623	16.6939	25.7569	3
PM10A	DJFM	Wet season	Cl	2.08785	1.3679	1.35237	1.69269	2.42049	6
PM10A	DJFM	Wet season	EC	22.2798	12.4748	12.8039	17.3312	33.3888	5
PM10A	DJFM	Wet season	F	0.48807	0.217629	0.376841	0.461268	0.511072	7
PM10A	DJFM	Wet season	For	4.40607	3.5851	2.22877	3.21711	4.73667	4
PM10A	DJFM	Wet season	Galactosan						0
PM10A	DJFM	Wet season	Glucose	1.96772	1.52078	1.14049	1.76402	2.1351	4
PM10A	DJFM	Wet season	K	4.61381	2.57939	2.22225	4.63864	6.23795	4
PM10A	DJFM	Wet season	Levoglucosan	0.757698	0.73572	0.353588	0.587957	0.760211	2
PM10A	DJFM	Wet season	Li	0.0107569	0.0117239	0.00448136	0.00545951	0.00989624	7
PM10A	DJFM	Wet season	MSA	1.79504	1.30789	0.751549	1.66787	2.62735	5
PM10A	DJFM	Wet season	Mannitol	0.747316	0.714139	0.441368	0.576576	0.664942	5
PM10A	DJFM	Wet season	Mannosan						0
PM10A	DJFM	Wet season	Mg	2.4912	1.82727	1.02691	1.86396	3.95953	2
PM10A	DJFM	Wet season	NH4	47.3534	40.964	7.43634	42.9113	76.2283	1
PM10A	DJFM	Wet season	NO3	26.1422	26.2249	4.01578	16.6747	33.5994	0
PM10A	DJFM	Wet season	Na	8.44396	5.24019	2.8707	9.46683	12.2164	2
PM10A	DJFM	Wet season	OC	253.27	155.331	160.785	207.946	304.261	2
PM10A	DJFM	Wet season	Ox	14.6436	11.3712	5.95294	13.8247	16.7155	0
PM10A	DJFM	Wet season	SO4	161.658	146.865	22.6078	129.574	296.718	1
PM10A	DJFM	Wet season	Sorbitol	0.0710019	0.0243097	0.0624072	0.0710019	0.0795967	15
PM10A	MJJA	Dry season	Arabitol	1.41387	1.15963	0.648295	0.888612	1.90428	1
PM10A	MJJA	Dry season	Br	0.698367	0.28614	0.56013	0.671019	0.832303	1
PM10A	MJJA	Dry season	Ca	45.4444	17.6742	33.0614	43.0834	51.1028	1
PM10A	MJJA	Dry season	Cl	4.76979	4.09728	2.20421	3.58471	4.98648	1
PM10A	MJJA	Dry season	EC	37.5707	31.8913	18.036	23.856	60.1665	15
PM10A	MJJA	Dry season	F	0.835901	0.562463	0.430064	0.677816	0.9696	3
PM10A	MJJA	Dry season	For	7.06132	4.61777	3.26099	6.62732	8.84136	5
PM10A	MJJA	Dry season	Galactosan	1.83445	3.67917	0.283712	0.482238	1.45631	12
PM10A	MJJA	Dry season	Glucose	1.33338	0.479878	1.03669	1.24561	1.60653	1
PM10A	MJJA	Dry season	K	12.738	9.03448	7.065	10.9506	14.0162	1
PM10A	MJJA	Dry season	Levoglucosan	9.80205	16.3607	3.11506	5.12825	9.26829	1
PM10A	MJJA	Dry season	Li	0.0224466	0.0116128	0.015489	0.0211528	0.0268173	1
PM10A	MJJA	Dry season	MSA	3.92087	1.70387	3.0131	3.60227	5.23388	0
PM10A	MJJA	Dry season	Mannitol	0.580255	0.243943	0.441283	0.546597	0.675202	4
PM10A	MJJA	Dry season	Mannosan	1.43616	3.09092	0.139779	0.427965	0.806163	9
PM10A	MJJA	Dry season	Mg	3.4819	1.30478	2.41927	3.12403	4.63321	1
PM10A	MJJA	Dry season	NH4	70.9823	34.8227	49.3064	67.5255	89.1275	0
PM10A	MJJA	Dry season	NO3	100.858	44.7373	65.1838	99.6879	122.844	1
PM10A	MJJA	Dry season	Na	11.1982	8.68425	5.0949	8.64341	12.3592	2
PM10A	MJJA	Dry season	OC	529.961	287.074	309.975	448.515	699.684	1
PM10A	MJJA	Dry season	Ox	8.05177	10.868	0.894675	1.93898	17.5984	2
PM10A	MJJA	Dry season	SO4	179.073	89.3118	127.47	162.286	226.475	0
PM10A	SON	Dry-to-wet transition	Arabitol	3.95079	3.86845	1.98374	2.96955	3.33525	0
PM10A	SON	Dry-to-wet transition	Br	1.2331	0.439917	0.955532	1.11517	1.44572	0
PM10A	SON	Dry-to-wet transition	Ca	52.4682	25.554	40.354	50.4495	72.6813	0
PM10A	SON	Dry-to-wet transition	Cl	7.57501	3.21601	5.03178	8.75184	10.0734	4
PM10A	SON	Dry-to-wet transition	EC	80.8504	61.2812	48.0949	60.6998	103.395	0
PM10A	SON	Dry-to-wet transition	F	2.06564	1.85541	0.959639	1.4696	1.64077	0
PM10A	SON	Dry-to-wet transition	For	9.03571	8.14128	4.08185	7.02303	9.34772	1
PM10A	SON	Dry-to-wet transition	Galactosan	0.395759	0.39597	0.0652881	0.35035	0.529248	4
PM10A	SON	Dry-to-wet transition	Glucose	2.37077	1.29019	1.82078	2.03043	2.61107	0
PM10A	SON	Dry-to-wet transition	K	23.7471	15.8732	12.3337	18.6028	25.526	0
PM10A	SON	Dry-to-wet transition	Levoglucosan	10.2571	10.2555	2.84175	5.82501	16.701	0
PM10A	SON	Dry-to-wet transition	Li	0.052087	0.061908	0.0179576	0.0354511	0.0488737	0
PM10A	SON	Dry-to-wet transition	MSA	3.68044	1.78494	2.16221	4.4624	5.03117	0
PM10A	SON	Dry-to-wet transition	Mannitol	1.03623	0.773426	0.598311	0.926675	1.06214	1
PM10A	SON	Dry-to-wet transition	Mannosan	2.0638	2.16574	0.85145	1.38163	2.93506	11
PM10A	SON	Dry-to-wet transition	Mg	6.20888	2.61281	4.5033	6.61997	7.32411	0
PM10A	SON	Dry-to-wet transition	NH4	147.332	55.3242	112.047	151.716	194.641	0
PM10A	SON	Dry-to-wet transition	NO3	112.465	77.126	42.16	121.628	162.283	0
PM10A	SON	Dry-to-wet transition	Na	22.683	14.8126	15.725	21.9916	23.7804	0
PM10A	SON	Dry-to-wet transition	OC	709.655	455	370.214	585.53	894.837	0
PM10A	SON	Dry-to-wet transition	Ox	36.8273	32.7636	21.0204	31.4278	40.1353	0
PM10A	SON	Dry-to-wet transition	SO4	441.167	175.975	349.465	425.446	549.987	0
PM10A	SON	Dry-to-wet transition	Sorbitol	0.243485		0.243485	0.243485	0.243485	13
PM10B	A	Wet-to-dry transition	Arabitol	0.355674	0.00976162	0.352223	0.355674	0.359125	3
PM10B	A	Wet-to-dry transition	Br	0.278844	0.240843	0.090443	0.250411	0.438812	1
PM10B	A	Wet-to-dry transition	Ca	16.682	11.744	5.9896	20.0792	20.921	0
PM10B	A	Wet-to-dry transition	Cl	1.00275	0.563067	0.837676	1.32275	1.32783	2
PM10B	A	Wet-to-dry transition	EC	20.5014	5.4241	17.34	18.5148	19.3035	0
PM10B	A	Wet-to-dry transition	Erythritol	0.20577		0.20577	0.20577	0.20577	4
PM10B	A	Wet-to-dry transition	F	0.288397	0.0977388	0.232008	0.23574	0.318457	2
PM10B	A	Wet-to-dry transition	For	1.42568	0.312218	1.31529	1.42568	1.53606	3
PM10B	A	Wet-to-dry transition	Galactosan	0.345559		0.345559	0.345559	0.345559	4
PM10B	A	Wet-to-dry transition	Glucose	0.764808	0.212194	0.553791	0.773033	0.934706	0
PM10B	A	Wet-to-dry transition	Glycerol	0.475264	0.112011	0.435662	0.475264	0.514866	3
PM10B	A	Wet-to-dry transition	Inositol						5
PM10B	A	Wet-to-dry transition	K	3.38472	2.33241	2.2925	2.67214	3.85723	0
PM10B	A	Wet-to-dry transition	Levoglucosan	2.20194		2.20194	2.20194	2.20194	4
PM10B	A	Wet-to-dry transition	Li	0.00207559	0.00127683	0.00113819	0.00180352	0.00274091	1
PM10B	A	Wet-to-dry transition	MSA	4.29365	2.53717	2.83677	3.28804	4.86908	0
PM10B	A	Wet-to-dry transition	Mannitol	0.418889	0.083287	0.371163	0.381337	0.447839	2
PM10B	A	Wet-to-dry transition	Mannosan						5
PM10B	A	Wet-to-dry transition	Mg	2.62585	2.15881	1.00105	2.22289	3.24774	0
PM10B	A	Wet-to-dry transition	NH4	127.931	53.6668	130.873	133.483	162.637	0
PM10B	A	Wet-to-dry transition	NO3	15.5509	14.2018	8.21139	9.65318	16.9927	1
PM10B	A	Wet-to-dry transition	Na	6.31854	2.96318	5.65699	5.84682	8.0782	0
PM10B	A	Wet-to-dry transition	OC	171.85	47.0843	137.039	173.275	208.78	0
PM10B	A	Wet-to-dry transition	Ox	4.93229	4.96561	0.912982	4.42401	8.44332	1
PM10B	A	Wet-to-dry transition	Rhamnose						5
PM10B	A	Wet-to-dry transition	SO4	467.58	268.84	372.207	494.696	498.238	0
PM10B	A	Wet-to-dry transition	Sorbitol	10.361	12.5053	3.1629	4.134	14.4456	2
PM10B	A	Wet-to-dry transition	Threalose						5
PM10B	A	Wet-to-dry transition	Xylitol						5
PM10B	DJFM	Wet season	Arabitol	0.766309	0.285762	0.564936	0.700533	0.901906	10
PM10B	DJFM	Wet season	Br	0.245122	0.0857594	0.210832	0.221904	0.30955	9
PM10B	DJFM	Wet season	Ca	12.814	11.3962	4.3169	7.04369	18.839	2
PM10B	DJFM	Wet season	Cl	0.82625	0.669653	0.589492	0.82625	1.06301	12
PM10B	DJFM	Wet season	EC	19.5027	10.6168	10	17.807	25.31	1
PM10B	DJFM	Wet season	Erythritol	0.271105	0.130259	0.179312	0.24132	0.35	9
PM10B	DJFM	Wet season	F	0.301475	0.219165	0.191016	0.248246	0.413743	4
PM10B	DJFM	Wet season	For	4.618	2.42962	3.03669	4.35618	5.93749	10
PM10B	DJFM	Wet season	Galactosan	0.250776	0.0612885	0.229108	0.250776	0.272445	12
PM10B	DJFM	Wet season	Glucose	1.73186	1.11004	0.987477	1.19189	2.49396	4
PM10B	DJFM	Wet season	Glycerol	2.4703	1.66562	1.23145	2.61068	3.84953	10
PM10B	DJFM	Wet season	Inositol	0.260472	0.136147	0.185708	0.227744	0.318872	11
PM10B	DJFM	Wet season	K	4.40622	3.68865	1.31238	4.23662	6.15615	3
PM10B	DJFM	Wet season	Levoglucosan	3.36748	1.4057	2.73054	3.1055	3.74245	10
PM10B	DJFM	Wet season	Li	0.00336346	0.00384623	0.00142062	0.00197505	0.0039179	10
PM10B	DJFM	Wet season	MSA	1.99613	1.43803	0.779019	1.72395	3.23034	2
PM10B	DJFM	Wet season	Mannitol	1.35263	0.785979	0.875595	1.12103	1.56	5
PM10B	DJFM	Wet season	Mannosan	0.440155	0.112565	0.377761	0.409252	0.487098	11
PM10B	DJFM	Wet season	Mg	1.67213	1.59097	0.52162	0.783112	3.04247	1
PM10B	DJFM	Wet season	NH4	92.571	77.754	35.4907	57.987	140.939	1
PM10B	DJFM	Wet season	NO3	15.6242	17.7595	3.23857	7.49272	23.718	3
PM10B	DJFM	Wet season	Na	11.3645	6.93717	6.24501	12.4651	16.5308	8
PM10B	DJFM	Wet season	OC	196.081	126.886	84.7152	184.655	258.217	1
PM10B	DJFM	Wet season	Ox	9.84125	10.8106	1.37829	4.67536	17.503	3
PM10B	DJFM	Wet season	Rhamnose						14
PM10B	DJFM	Wet season	SO4	273.293	243.307	89.385	179.032	451.687	0
PM10B	DJFM	Wet season	Sorbitol	5.17967	1.61733	4.11743	5.175	6.67686	6
PM10B	DJFM	Wet season	Threalose	0.813999	0.665128	0.465998	0.747214	1.12861	11
PM10B	DJFM	Wet season	Xylitol						14
PM10B	MJJA	Dry season	Arabitol	0.556817	0.127029	0.468312	0.519919	0.626582	6
PM10B	MJJA	Dry season	Br	0.886101	0.660809	0.238457	0.923243	1.2566	3
PM10B	MJJA	Dry season	Ca	34.0457	16.3826	27.3755	31.5803	40.3067	2
PM10B	MJJA	Dry season	Cl	5.63741	4.36841	2.04873	4.73197	8.3505	2
PM10B	MJJA	Dry season	EC	46.1882	31.8774	20.6247	35.7548	58.8969	2
PM10B	MJJA	Dry season	Erythritol	0.554963	0.322783	0.335899	0.482915	0.677246	3
PM10B	MJJA	Dry season	F	1.01231	0.609362	0.554271	0.907287	1.28337	3
PM10B	MJJA	Dry season	For	6.82021	5.98115	3.64563	5.21154	6.32796	15
PM10B	MJJA	Dry season	Galactosan	4.37673	5.59395	0.895895	2.55001	3.45288	10
PM10B	MJJA	Dry season	Glucose	1.29748	0.582755	0.833258	1.34195	1.68762	4
PM10B	MJJA	Dry season	Glycerol	2.00594	0.970756	1.11531	2.32934	2.70563	13
PM10B	MJJA	Dry season	Inositol	0.318326	0.148031	0.189057	0.370895	0.4	10
PM10B	MJJA	Dry season	K	24.1193	21.2274	6.48358	22.046	34.016	2
PM10B	MJJA	Dry season	Levoglucosan	25.9165	26.929	4.5924	17.461	36.4401	6
PM10B	MJJA	Dry season	Li	0.00295435	0.00327881	0.00148374	0.00217529	0.00265601	15
PM10B	MJJA	Dry season	MSA	3.95817	1.58343	3.1	3.65113	4.43456	2
PM10B	MJJA	Dry season	Mannitol	0.841958	0.353244	0.592087	0.845773	1.055	4
PM10B	MJJA	Dry season	Mannosan	5.55748	6.40171	1.43438	4.06984	4.60478	10
PM10B	MJJA	Dry season	Mg	3.1786	1.78364	2.08083	2.60514	4.00914	2
PM10B	MJJA	Dry season	NH4	169.471	83.6517	91.95	206.177	234.217	2
PM10B	MJJA	Dry season	NO3	85.2316	72.3638	30.2742	59.817	123.423	2
PM10B	MJJA	Dry season	Na	12.6615	6.43114	8.10544	11.4213	17.5754	3
PM10B	MJJA	Dry season	OC	483.204	317.859	247.095	420.249	595.738	2
PM10B	MJJA	Dry season	Ox	19.3345	15.492	7.062	16.5566	28.9738	2
PM10B	MJJA	Dry season	Rhamnose	0.337082	0.291185	0.234133	0.337082	0.440032	21
PM10B	MJJA	Dry season	SO4	485.072	325.901	228.668	497.946	675.434	0
PM10B	MJJA	Dry season	Sorbitol	3.50839	1.73635	2.21835	3.67557	4.63874	13
PM10B	MJJA	Dry season	Threalose	0.821605	0.365528	0.55137	0.873429	1.10016	16
PM10B	MJJA	Dry season	Xylitol						23
PM10B	SON	Dry-to-wet transition	Arabitol	0.519372	0.142372	0.425811	0.516437	0.622532	2
PM10B	SON	Dry-to-wet transition	Br	1.43294	1.12461	0.909644	1.44863	1.50471	1
PM10B	SON	Dry-to-wet transition	Ca	52.9477	29.215	29.0076	44.078	72.8576	0
PM10B	SON	Dry-to-wet transition	Cl	8.83358	10.1134	2.92195	4.57544	8.69072	2
PM10B	SON	Dry-to-wet transition	EC	70.0466	52.9337	33.8286	51.7292	81.2417	0
PM10B	SON	Dry-to-wet transition	Erythritol	0.616057	0.42495	0.351351	0.553747	0.782607	1
PM10B	SON	Dry-to-wet transition	F	0.983722	0.684995	0.593158	0.898523	1.11565	1
PM10B	SON	Dry-to-wet transition	For	79.3369	101.347	43.5053	79.3369	115.168	8
PM10B	SON	Dry-to-wet transition	Galactosan	1.13893	0.881398	0.51337	1.15961	1.34066	0
PM10B	SON	Dry-to-wet transition	Glucose	2.22575	1.07938	1.36398	2.20593	2.78861	0
PM10B	SON	Dry-to-wet transition	Glycerol	2.40808	1.15644	1.56155	2.04143	3.15018	3
PM10B	SON	Dry-to-wet transition	Inositol	0.316889	0.135382	0.237477	0.303128	0.382628	2
PM10B	SON	Dry-to-wet transition	K	28.7381	11.0507	26.1023	29.5528	32.5359	0
PM10B	SON	Dry-to-wet transition	Levoglucosan	16.9011	11.5789	10.2434	16.9551	19.5526	0
PM10B	SON	Dry-to-wet transition	Li	0.02579	0.0242824	0.0118641	0.0146652	0.0341535	7
PM10B	SON	Dry-to-wet transition	MSA	4.27313	1.43165	3.2836	4.11755	4.80646	0
PM10B	SON	Dry-to-wet transition	Mannitol	1.05782	0.501382	0.661561	1.02737	1.30696	1
PM10B	SON	Dry-to-wet transition	Mannosan	2.02455	1.41462	1.08461	2.12539	2.19873	1
PM10B	SON	Dry-to-wet transition	Mg	7.62442	5.41693	3.30026	5.01443	11.6561	0
PM10B	SON	Dry-to-wet transition	NH4	283.402	95.2734	259.905	293.436	343.625	0
PM10B	SON	Dry-to-wet transition	NO3	65.5142	40.6741	37.1009	48.4283	83.5536	1
PM10B	SON	Dry-to-wet transition	Na	30.2617	21.8339	15.1814	25.354	33.7397	0
PM10B	SON	Dry-to-wet transition	OC	719.108	286.76	496.489	663.722	981.556	0
PM10B	SON	Dry-to-wet transition	Ox	41.5293	25.2172	32.1429	40.4065	51.0401	1
PM10B	SON	Dry-to-wet transition	Rhamnose						10
PM10B	SON	Dry-to-wet transition	SO4	1025.63	423.992	798.932	1067.34	1358.93	0
PM10B	SON	Dry-to-wet transition	Sorbitol	4.26604	1.93793	3.14975	3.28095	4.88979	7
PM10B	SON	Dry-to-wet transition	Threalose	2.21616		2.21616	2.21616	2.21616	9
PM10B	SON	Dry-to-wet transition	Xylitol						10
PM10C	A	Wet-to-dry transition	Arabitol	0.371119	0.0522196	0.352656	0.371119	0.389581	2
PM10C	A	Wet-to-dry transition	Br	0.327679	0.143398	0.233227	0.339431	0.433883	0
PM10C	A	Wet-to-dry transition	Ca	21.4927	9.73648	16.1865	22.2711	27.5774	0
PM10C	A	Wet-to-dry transition	Cl	0.578886	0.633108	0.213632	0.237995	0.773695	1
PM10C	A	Wet-to-dry transition	EC	35.294	19.2553	21.8708	32.7165	46.1397	0
PM10C	A	Wet-to-dry transition	Erythritol						4
PM10C	A	Wet-to-dry transition	F						4
PM10C	A	Wet-to-dry transition	For	1.39796	0.271694	1.3019	1.39796	1.49402	2
PM10C	A	Wet-to-dry transition	Galactosan						4
PM10C	A	Wet-to-dry transition	Glucose	0.828024	0.494721	0.575187	0.805336	1.06952	1
PM10C	A	Wet-to-dry transition	Glycerol	2.71184		2.71184	2.71184	2.71184	3
PM10C	A	Wet-to-dry transition	Inositol	0.429536	0.137351	0.319313	0.41712	0.527343	0
PM10C	A	Wet-to-dry transition	K	9.60361	5.09565	6.61228	8.5123	11.5036	0
PM10C	A	Wet-to-dry transition	Levoglucosan						4
PM10C	A	Wet-to-dry transition	Li	0.00786712	0.00583826	0.0035486	0.00620077	0.0105193	0
PM10C	A	Wet-to-dry transition	MSA	2.65751	0.963295	2.25824	2.94676	3.34604	0
PM10C	A	Wet-to-dry transition	Mannitol	0.459305	0.0384862	0.445698	0.459305	0.472912	2
PM10C	A	Wet-to-dry transition	Mannosan						4
PM10C	A	Wet-to-dry transition	Mg	3.23576	1.83388	2.07819	2.9135	4.07107	0
PM10C	A	Wet-to-dry transition	NH4	215.484	123.911	160.583	191.547	246.448	0
PM10C	A	Wet-to-dry transition	NO3	20.9318	9.34296	14.0988	18.1319	24.9649	0
PM10C	A	Wet-to-dry transition	Na	6.27587	3.48939	4.17309	6.83833	8.94111	0
PM10C	A	Wet-to-dry transition	OC	270.611	108.213	188.041	254.723	337.293	0
PM10C	A	Wet-to-dry transition	Ox	31.747	20.1563	20.2674	23.5791	35.0588	0
PM10C	A	Wet-to-dry transition	Rhamnose						4
PM10C	A	Wet-to-dry transition	SO4	634.713	322.147	454.019	582.406	763.101	0
PM10C	A	Wet-to-dry transition	Sorbitol						4
PM10C	A	Wet-to-dry transition	Threalose	0.264094	0.0375012	0.250835	0.264094	0.277352	2
PM10C	A	Wet-to-dry transition	Xylitol						4
PM10C	DJFM	Wet season	Arabitol	0.36473	0.340134	0.132687	0.277747	0.43645	5
PM10C	DJFM	Wet season	Br	0.323725	0.328332	0.0964753	0.129419	0.554549	2
PM10C	DJFM	Wet season	Ca	12.1897	8.60391	6.09331	9.2991	16.6033	0
PM10C	DJFM	Wet season	Cl	0.294558	0.294535	0.0813782	0.196428	0.438632	4
PM10C	DJFM	Wet season	EC	20.11	11.9907	13.4261	19.2322	24.8878	0
PM10C	DJFM	Wet season	Erythritol						11
PM10C	DJFM	Wet season	F	0.025437	0.0361564	0.00922629	0.0100835	0.0101699	6
PM10C	DJFM	Wet season	For	1.18692	1.10071	0.437327	0.78158	1.49587	3
PM10C	DJFM	Wet season	Galactosan	0.0469151	0.0263793	0.0375887	0.0469151	0.0562416	9
PM10C	DJFM	Wet season	Glucose	1.05795	0.816648	0.537344	0.842959	1.29058	3
PM10C	DJFM	Wet season	Glycerol	4.36161	4.65102	1.94348	2.15658	3.88847	6
PM10C	DJFM	Wet season	Inositol	0.305197	0.130187	0.222578	0.321466	0.357819	2
PM10C	DJFM	Wet season	K	4.30989	3.46266	1.99181	3.27058	4.95175	1
PM10C	DJFM	Wet season	Levoglucosan	1.4758	1.04025	0.559368	1.30599	2.2271	6
PM10C	DJFM	Wet season	Li	0.00765289	0.00358985	0.0070645	0.0071441	0.00833415	2
PM10C	DJFM	Wet season	MSA	2.00459	1.86988	0.525541	1.02548	3.47521	0
PM10C	DJFM	Wet season	Mannitol	0.892538	0.636134	0.457057	0.947735	1.01217	6
PM10C	DJFM	Wet season	Mannosan	0.0887623	0.0380969	0.0752931	0.0887623	0.102232	9
PM10C	DJFM	Wet season	Mg	2.37539	1.25732	1.56067	2.75238	3.33394	0
PM10C	DJFM	Wet season	NH4	107.259	62.9323	61.0852	121.76	130.164	0
PM10C	DJFM	Wet season	NO3	7.35012	6.75945	3.43092	4.80766	9.02839	3
PM10C	DJFM	Wet season	Na	4.37095	3.33097	1.55262	4.78135	6.1923	0
PM10C	DJFM	Wet season	OC	164.362	86.8208	119.47	153.194	173.258	0
PM10C	DJFM	Wet season	Ox	20.7037	9.82695	12.6594	22.4039	28.8	0
PM10C	DJFM	Wet season	Rhamnose						11
PM10C	DJFM	Wet season	SO4	352.661	189.875	263.856	352.812	461.545	0
PM10C	DJFM	Wet season	Sorbitol	2.00132	1.2422	1.48061	2.05501	2.57572	7
PM10C	DJFM	Wet season	Threalose	0.345708	0.348273	0.222575	0.345708	0.468841	9
PM10C	DJFM	Wet season	Xylitol						11
PM10C	MJJA	Dry season	Arabitol	0.271949	0.138684	0.144201	0.232491	0.381652	3
PM10C	MJJA	Dry season	Br	0.690981	0.488796	0.395991	0.445146	0.847787	1
PM10C	MJJA	Dry season	Ca	42.1557	24.6587	24.2332	41.9583	55.4115	0
PM10C	MJJA	Dry season	Cl	3.01154	1.94384	1.35875	2.95767	3.47459	1
PM10C	MJJA	Dry season	EC	46.1013	31.455	25.5841	37.3437	51.5076	0
PM10C	MJJA	Dry season	Erythritol	0.484167	0.26542	0.272563	0.444326	0.655931	11
PM10C	MJJA	Dry season	F	0.187671	0.221697	0.0196335	0.069838	0.224317	6
PM10C	MJJA	Dry season	For	1.45235	0.799079	0.948931	1.08299	2.07412	0
PM10C	MJJA	Dry season	Galactosan	0.675792	0.506801	0.385632	0.560317	0.802211	4
PM10C	MJJA	Dry season	Glucose	1.00643	0.494099	0.747561	1.0376	1.28535	5
PM10C	MJJA	Dry season	Glycerol	1.23515	0.189801	1.1405	1.18884	1.28348	11
PM10C	MJJA	Dry season	Inositol	0.45756	0.177926	0.294769	0.493721	0.583945	1
PM10C	MJJA	Dry season	K	21.3735	16.7482	10.7344	15.0987	26.3523	0
PM10C	MJJA	Dry season	Levoglucosan	8.12203	6.06085	3.27592	7.94049	9.72422	3
PM10C	MJJA	Dry season	Li	0.00960425	0.00793085	0.00362787	0.00681528	0.0165399	3
PM10C	MJJA	Dry season	MSA	2.76994	0.812965	2.35727	2.76001	3.21075	0
PM10C	MJJA	Dry season	Mannitol	0.40639	0.263183	0.217338	0.264567	0.568231	10
PM10C	MJJA	Dry season	Mannosan	0.870111	0.72543	0.397944	0.683696	0.981493	4
PM10C	MJJA	Dry season	Mg	4.69798	3.15173	2.84381	3.57124	5.95868	0
PM10C	MJJA	Dry season	NH4	168.821	81.052	123.889	159.166	182.858	0
PM10C	MJJA	Dry season	NO3	34.6677	28.9532	7.6171	29.3259	62.7557	0
PM10C	MJJA	Dry season	Na	8.59071	6.91285	3.62257	5.87825	11.735	1
PM10C	MJJA	Dry season	OC	447.217	281.832	257.65	374.738	542.029	0
PM10C	MJJA	Dry season	Ox	31.7014	19.836	19.2286	23.1676	39.9677	0
PM10C	MJJA	Dry season	Rhamnose						15
PM10C	MJJA	Dry season	SO4	567.466	276.46	429.981	483.153	680.226	0
PM10C	MJJA	Dry season	Sorbitol						15
PM10C	MJJA	Dry season	Threalose	0.255101	0.137444	0.154673	0.185104	0.326866	8
PM10C	MJJA	Dry season	Xylitol						15
PM10C	SON	Dry-to-wet transition	Arabitol	0.205877	0.115284	0.165118	0.205877	0.246636	0
PM10C	SON	Dry-to-wet transition	Br	0.38023		0.38023	0.38023	0.38023	1
PM10C	SON	Dry-to-wet transition	Ca	15.9843	6.31738	13.7508	15.9843	18.2178	0
PM10C	SON	Dry-to-wet transition	Cl	0.812612		0.812612	0.812612	0.812612	1
PM10C	SON	Dry-to-wet transition	EC	33.0414	1.60521	32.4739	33.0414	33.6089	0
PM10C	SON	Dry-to-wet transition	Erythritol						2
PM10C	SON	Dry-to-wet transition	F						2
PM10C	SON	Dry-to-wet transition	For	1.55424	0.532148	1.36609	1.55424	1.74238	0
PM10C	SON	Dry-to-wet transition	Galactosan	0.591082		0.591082	0.591082	0.591082	1
PM10C	SON	Dry-to-wet transition	Glucose	0.576167	0.153591	0.521864	0.576167	0.630469	0
PM10C	SON	Dry-to-wet transition	Glycerol						2
PM10C	SON	Dry-to-wet transition	Inositol	0.710508	0.031692	0.699303	0.710508	0.721712	0
PM10C	SON	Dry-to-wet transition	K	12.3532	1.80901	11.7137	12.3532	12.9928	0
PM10C	SON	Dry-to-wet transition	Levoglucosan	3.35961	0.963235	3.01905	3.35961	3.70016	0
PM10C	SON	Dry-to-wet transition	Li	0.00238376	0.000308527	0.00227468	0.00238376	0.00249284	0
PM10C	SON	Dry-to-wet transition	MSA	1.25658	0.286308	1.15536	1.25658	1.35781	0
PM10C	SON	Dry-to-wet transition	Mannitol	0.596403		0.596403	0.596403	0.596403	1
PM10C	SON	Dry-to-wet transition	Mannosan	0.473737		0.473737	0.473737	0.473737	1
PM10C	SON	Dry-to-wet transition	Mg	1.61392	0.201431	1.5427	1.61392	1.68514	0
PM10C	SON	Dry-to-wet transition	NH4	99.1839	7.49283	96.5347	99.1839	101.833	0
PM10C	SON	Dry-to-wet transition	NO3	15.6485	0.286733	15.5471	15.6485	15.7498	0
PM10C	SON	Dry-to-wet transition	Na	3.02695	1.10962	2.63464	3.02695	3.41926	0
PM10C	SON	Dry-to-wet transition	OC	335.06	51.4393	316.873	335.06	353.246	0
PM10C	SON	Dry-to-wet transition	Ox	36.1462	9.82789	32.6715	36.1462	39.6209	0
PM10C	SON	Dry-to-wet transition	Rhamnose						2
PM10C	SON	Dry-to-wet transition	SO4	278.919	11.592	274.821	278.919	283.018	0
PM10C	SON	Dry-to-wet transition	Sorbitol						2
PM10C	SON	Dry-to-wet transition	Threalose	0.603789	0.220652	0.525777	0.603789	0.681801	0
PM10C	SON	Dry-to-wet transition	Xylitol						2
PM2.5	A	Wet-to-dry transition	Arabitol	0.788271	0.114929	0.747638	0.788271	0.828905	4
PM2.5	A	Wet-to-dry transition	Br	0.246877	0.126681	0.152964	0.20894	0.276237	1
PM2.5	A	Wet-to-dry transition	Ca	36.0961	27.4034	22.5492	31.1563	35.7901	0
PM2.5	A	Wet-to-dry transition	Cl	9.19691		9.19691	9.19691	9.19691	5
PM2.5	A	Wet-to-dry transition	EC	39.1308	30.5607	17.8839	36.9319	63.1093	0
PM2.5	A	Wet-to-dry transition	Erythritol						6
PM2.5	A	Wet-to-dry transition	F	0.995762	1.18236	0.425951	0.624497	0.741953	0
PM2.5	A	Wet-to-dry transition	For	7.62664	0.674386	7.38821	7.62664	7.86507	4
PM2.5	A	Wet-to-dry transition	Galactosan						6
PM2.5	A	Wet-to-dry transition	Glucose	2.07033	0.396123	1.93028	2.07033	2.21038	4
PM2.5	A	Wet-to-dry transition	Glycerol						6
PM2.5	A	Wet-to-dry transition	Inositol	0.241691		0.241691	0.241691	0.241691	5
PM2.5	A	Wet-to-dry transition	K	6.32046	4.84249	2.68194	5.83877	8.96864	0
PM2.5	A	Wet-to-dry transition	Levoglucosan	1.07358	0.716352	0.639441	1.0103	1.44444	2
PM2.5	A	Wet-to-dry transition	Li	0.0100779	0.00107776	0.00969688	0.0100779	0.010459	4
PM2.5	A	Wet-to-dry transition	MSA	2.98437	1.52896	2.26275	3.52975	3.95239	0
PM2.5	A	Wet-to-dry transition	Mannitol	1.34234	0.530747	1.15469	1.34234	1.52999	4
PM2.5	A	Wet-to-dry transition	Mannosan	0.038636		0.038636	0.038636	0.038636	5
PM2.5	A	Wet-to-dry transition	Mg	2.64972	2.21338	0.872717	1.74949	4.5237	0
PM2.5	A	Wet-to-dry transition	NH4	185.579	131.267	88.1504	186.644	287.005	0
PM2.5	A	Wet-to-dry transition	NO3	44.7625	69.1847	8.05564	22.6224	28.9838	0
PM2.5	A	Wet-to-dry transition	Na	9.81376	5.09646	7.32676	8.94042	11.4274	2
PM2.5	A	Wet-to-dry transition	OC	303.774	188.966	212.558	268.264	334.496	0
PM2.5	A	Wet-to-dry transition	Ox	25.4771	17.8212	15.6353	21.2695	33.7554	0
PM2.5	A	Wet-to-dry transition	Rhamnose						6
PM2.5	A	Wet-to-dry transition	SO4	573.151	457.31	219.698	550.174	898.759	0
PM2.5	A	Wet-to-dry transition	Sorbitol	4.79238	2.0169	3.9694	5.39627	5.91731	3
PM2.5	A	Wet-to-dry transition	Threalose	0.517389		0.517389	0.517389	0.517389	5
PM2.5	A	Wet-to-dry transition	Xylitol						6
PM2.5	DJFM	Wet season	Arabitol	0.363308	0.244944	0.253739	0.408597	0.495522	8
PM2.5	DJFM	Wet season	Br	0.928025	0.828515	0.316813	0.832	1.44321	7
PM2.5	DJFM	Wet season	Ca	15.2889	12.0702	4.56769	11.0529	22.6548	0
PM2.5	DJFM	Wet season	Cl	2.3831		2.3831	2.3831	2.3831	10
PM2.5	DJFM	Wet season	EC	27.4569	16.4718	13.2254	29.0759	38.9744	3
PM2.5	DJFM	Wet season	Erythritol						11
PM2.5	DJFM	Wet season	F	0.481516	0.295485	0.272097	0.318428	0.56005	2
PM2.5	DJFM	Wet season	For	4.87229		4.87229	4.87229	4.87229	10
PM2.5	DJFM	Wet season	Galactosan	0.169799		0.169799	0.169799	0.169799	10
PM2.5	DJFM	Wet season	Glucose	1.50871	0.715579	0.952872	1.49222	2.04806	7
PM2.5	DJFM	Wet season	Glycerol						11
PM2.5	DJFM	Wet season	Inositol	0.208485		0.208485	0.208485	0.208485	10
PM2.5	DJFM	Wet season	K	4.35887	3.05497	1.76331	3.42129	6.69964	2
PM2.5	DJFM	Wet season	Levoglucosan	1.49598	1.5403	0.343455	1.30239	1.78754	6
PM2.5	DJFM	Wet season	Li	0.0138491	0.00261685	0.0129239	0.0138491	0.0147743	9
PM2.5	DJFM	Wet season	MSA	1.91433	1.41295	1.01173	1.53233	2.61188	3
PM2.5	DJFM	Wet season	Mannitol	0.979434	0.524798	0.801559	1.22641	1.28079	8
PM2.5	DJFM	Wet season	Mannosan	0.34265		0.34265	0.34265	0.34265	10
PM2.5	DJFM	Wet season	Mg	1.98348	1.62813	0.308591	2.39009	2.87235	2
PM2.5	DJFM	Wet season	NH4	74.0093	98.2707	21.8887	30.1477	65.2489	1
PM2.5	DJFM	Wet season	NO3	20.346	16.9997	12.3158	15.0555	20.4239	2
PM2.5	DJFM	Wet season	Na	8.81372	5.70672	5.2846	7.15306	9.39128	4
PM2.5	DJFM	Wet season	OC	259.314	194.234	137.115	213.934	291.78	1
PM2.5	DJFM	Wet season	Ox	14.4967	9.67189	5.5278	13.3615	22.989	0
PM2.5	DJFM	Wet season	Rhamnose						11
PM2.5	DJFM	Wet season	SO4	274.277	369.633	30.8928	149.612	259.563	1
PM2.5	DJFM	Wet season	Sorbitol	2.90999	0.720163	2.44423	3.03934	3.5051	7
PM2.5	DJFM	Wet season	Threalose	0.571352		0.571352	0.571352	0.571352	10
PM2.5	DJFM	Wet season	Xylitol						11
PM2.5	MJJA	Dry season	Arabitol	0.965211	0.482458	0.576938	0.907194	1.07826	17
PM2.5	MJJA	Dry season	Br	0.611444	0.385523	0.350127	0.436178	0.795902	3
PM2.5	MJJA	Dry season	Ca	68.8724	52.2674	38.9153	59.5929	71.2613	1
PM2.5	MJJA	Dry season	Cl	7.72183	6.61621	3.0357	5.62284	10.9013	7
PM2.5	MJJA	Dry season	EC	47.9414	24.6909	29.836	43.5018	65.679	3
PM2.5	MJJA	Dry season	Erythritol	0.641545	0.220224	0.563684	0.641545	0.719406	33
PM2.5	MJJA	Dry season	F	1.92375	1.49079	0.827255	1.51977	2.34446	2
PM2.5	MJJA	Dry season	For	7.43836	3.58388	5.00154	6.38977	8.437	11
PM2.5	MJJA	Dry season	Galactosan	1.14369	1.62845	0.227637	0.514838	1.05934	12
PM2.5	MJJA	Dry season	Glucose	2.12466	1.86999	0.96707	1.64339	2.4132	14
PM2.5	MJJA	Dry season	Glycerol						35
PM2.5	MJJA	Dry season	Inositol	0.227975	0.0916433	0.172404	0.201266	0.249338	24
PM2.5	MJJA	Dry season	K	17.9076	10.4119	11.1026	16.0725	22.2045	1
PM2.5	MJJA	Dry season	Levoglucosan	10.641	13.5577	2.19972	4.85021	12.3825	2
PM2.5	MJJA	Dry season	Li	0.012457	0.00836975	0.00734169	0.00919045	0.0154599	9
PM2.5	MJJA	Dry season	MSA	4.56188	2.02606	3.1296	4.12767	5.52192	1
PM2.5	MJJA	Dry season	Mannitol	0.849827	0.475369	0.483464	0.750527	1.09256	15
PM2.5	MJJA	Dry season	Mannosan	1.49643	2.24958	0.303172	0.471441	1.55872	11
PM2.5	MJJA	Dry season	Mg	5.59545	3.23614	3.38874	4.49857	7.15324	2
PM2.5	MJJA	Dry season	NH4	187.745	103.178	114.494	167.098	227.688	1
PM2.5	MJJA	Dry season	NO3	45.9384	32.7736	19.9117	35.437	62.1217	2
PM2.5	MJJA	Dry season	Na	14.0769	8.2474	7.85713	13.3234	16.8433	2
PM2.5	MJJA	Dry season	OC	551.851	510.061	309.16	430.282	598.68	2
PM2.5	MJJA	Dry season	Ox	21.1849	12.6822	14.4878	21.2539	27.8024	4
PM2.5	MJJA	Dry season	Rhamnose						35
PM2.5	MJJA	Dry season	SO4	727.724	477.199	406.284	720.513	891.427	0
PM2.5	MJJA	Dry season	Sorbitol	3.97904	1.89652	2.40378	3.55982	4.72352	20
PM2.5	MJJA	Dry season	Threalose	0.828128	0.591909	0.512547	0.6775	0.855449	24
PM2.5	MJJA	Dry season	Xylitol						35
PM2.5	SON	Dry-to-wet transition	Arabitol	0.926565	0.474001	0.645569	0.784211	0.968376	7
PM2.5	SON	Dry-to-wet transition	Br	0.669921	0.400131	0.455603	0.587819	0.73117	0
PM2.5	SON	Dry-to-wet transition	Ca	40.3266	22.7495	23.0708	39.2177	51.7924	0
PM2.5	SON	Dry-to-wet transition	Cl	5.74251	4.02164	3.37344	4.21178	5.96389	13
PM2.5	SON	Dry-to-wet transition	EC	42.4422	27.5657	23.399	33.7808	51.881	0
PM2.5	SON	Dry-to-wet transition	Erythritol	0.497021		0.497021	0.497021	0.497021	27
PM2.5	SON	Dry-to-wet transition	F	1.37712	1.11419	0.645622	0.93555	1.77644	0
PM2.5	SON	Dry-to-wet transition	For	7.30857	4.12957	4.25587	5.9069	8.23678	5
PM2.5	SON	Dry-to-wet transition	Galactosan	0.362306	0.264018	0.184601	0.274334	0.518043	4
PM2.5	SON	Dry-to-wet transition	Glucose	1.87462	0.979461	1.18484	1.42885	2.62927	7
PM2.5	SON	Dry-to-wet transition	Glycerol						28
PM2.5	SON	Dry-to-wet transition	Inositol	0.183157	0.028446	0.170149	0.187513	0.198344	25
PM2.5	SON	Dry-to-wet transition	K	14.4625	7.30627	9.41581	12.6862	19.033	0
PM2.5	SON	Dry-to-wet transition	Levoglucosan	6.11725	3.80787	3.27444	5.37435	8.72783	0
PM2.5	SON	Dry-to-wet transition	Li	0.0234056	0.0245313	0.0141946	0.0200408	0.0247056	6
PM2.5	SON	Dry-to-wet transition	MSA	4.58643	2.65531	3.12284	4.01782	5.86745	0
PM2.5	SON	Dry-to-wet transition	Mannitol	0.866336	0.854187	0.490367	0.606759	0.771687	10
PM2.5	SON	Dry-to-wet transition	Mannosan	0.758976	1.6215	0.168074	0.422059	0.663779	4
PM2.5	SON	Dry-to-wet transition	Mg	4.57814	2.23606	3.33	4.56048	6.04744	1
PM2.5	SON	Dry-to-wet transition	NH4	157.652	79.1737	93.5023	153.157	203.262	0
PM2.5	SON	Dry-to-wet transition	NO3	51.5192	48.7599	25.6069	41.8047	53.6185	0
PM2.5	SON	Dry-to-wet transition	Na	14.4945	8.83573	8.14857	11.4123	20.2322	1
PM2.5	SON	Dry-to-wet transition	OC	472.474	243.996	258.575	437.119	589.346	0
PM2.5	SON	Dry-to-wet transition	Ox	28.787	19.6727	14.1701	24.5634	36.5362	0
PM2.5	SON	Dry-to-wet transition	Rhamnose						28
PM2.5	SON	Dry-to-wet transition	SO4	562.315	299.084	351.948	493.602	660.219	0
PM2.5	SON	Dry-to-wet transition	Sorbitol	10.4636	4.81582	6.86862	12.8266	14.1011	21
PM2.5	SON	Dry-to-wet transition	Threalose	0.730308	0.335083	0.489425	0.562464	0.939243	20
PM2.5	SON	Dry-to-wet transition	Xylitol						28

## Sheet: Wilcoxon_rank_sum_test
Chacaltaya data - Comparison of median values between different PM periods
p= p score of Wilcoxon rank sum test (significance level set to 0,05)
H = Null hypothesis: H=1, medians are different; H=0, medians are the same
PM[X]/ PM[Y] = Ratio of concentrations of periods PM[X] and PM[Y] if the medians are different
		PM10A vs PM 2.5			PM10B vs PM 2.5			PM10C vs PM 2.5			PM10A vs PM10B			PM10B vs PM10C			PM10A vs PM10C
Species	Season	p	H	PM10A/ PM2.5	p	H	PM10B/ PM2.5	p	H	PM10C/ PM2.5	p	H	PM10A/ PM10B	p	H	PM10B/ PM10C	p	H	PM10A/ PM10C
OC	bulk	0.7411	0	0	0.243611	0	0	0.00918775	1	0.689122	0.209218	0	0	0.171627	0	0	0.00671474	1	1.50441
	DJFM	0.718432	0	0	0.475722	0	0	0.245278	0	0	0.381442	0	0	0.562343	0	0	0.0292725	1	1.54093
	A	0.428571	0	0	0.177489	0	0	0.914286	0	0	0.00793651	1	1.91036	0.285714	0	0	0.555556	0	0
	MJJA	0.737615	0	0	0.631883	0	0	0.462941	0	0	0.429741	0	0	0.847331	0	0	0.258853	0	0
	SON	0.0564247	0	0	0.0162456	1	1.522	0.588909	0	0	0.464214	0	0	0.030303	1	2.14621	0.333333	0	0
EC	bulk	0.728454	0	0	0.16699	0	0	0.0666504	0	0	0.548281	0	0	0.738911	0	0	0.420942	0	0
	DJFM	0.728454	0	0	0.404936	0	0	0.492022	0	0	0.531631	0	0	0.907753	0	0	0.877717	0	0
	A	0.857143	0	0	0.428571	0	0	0.914286	0	0	0.0952381	0	0	0.412698	0	0	0.8	0	0
	MJJA	0.19299	0	0	0.506853	0	0	0.545327	0	0	0.510068	0	0	0.948831	0	0	0.258636	0	0
	SON	0.0169398	1	1.90495	0.0708157	0	0	1	0	0	0.578031	0	0	0.363636	0	0	0.2	0	0
Li+	bulk	0.0247209	1	1.66037	3.65206e-06	1	0.378925	0.000303245	1	0.478654	7.60902e-07	1	4.3818	0.0117044	1	0.791647	5.87039e-06	1	3.46884
	DJFM	0.272727	0	0	0.133333	0	0	0.0727273	0	0	0.0759241	0	0	0.148252	0	0	0.780186	0	0
	A	1	0	0	0.133333	0	0	0.533333	0	0	0.133333	0	0	0.114286	0	0	0.533333	0	0
	MJJA	0.000664622	1	1.80193	0.000326779	1	0.237164	0.181988	0	0	6.07777e-05	1	7.59782	0.0228475	1	0.307608	0.00182551	1	2.33715
	SON	0.0393437	1	2.22541	1	0	0	0.0247295	1	0.101846	0.591176	0	0	0.2	0	0	0.0166667	1	21.8508
Na+	bulk	0.515425	0	0	0.599255	0	0	1.69066e-06	1	0.477548	0.341853	0	0	1.80746e-05	1	2.48471	0.000246726	1	2.09461
	DJFM	0.943803	0	0	0.628205	0	0	0.104198	0	0	0.370641	0	0	0.0476729	1	2.6	0.0292725	1	1.93184
	A	0.685714	0	0	0.412698	0	0	0.485714	0	0	0.190476	0	0	0.904762	0	0	0.2	0	0
	MJJA	0.0576211	0	0	0.679708	0	0	0.0108591	1	0.610271	0.225201	0	0	0.0342548	1	1.47386	0.2067	0	0
	SON	0.0268855	1	1.56494	0.00982166	1	2.0878	0.0225628	1	0.208834	0.464214	0	0	0.030303	1	9.99742	0.0333333	1	7.49369
NH4+	bulk	1.49741e-06	1	0.517682	0.67558	0	0	0.680833	0	0	2.15014e-05	1	0.499549	0.381956	0	0	8.41815e-05	1	0.562996
	DJFM	0.731914	0	0	0.306172	0	0	0.113102	0	0	0.100076	0	0	0.486906	0	0	0.0110429	1	0.441484
	A	0.329004	0	0	0.792208	0	0	0.761905	0	0	0.309524	0	0	0.190476	0	0	0.0634921	0	0
	MJJA	5.22192e-07	1	0.378079	0.85566	0	0	0.688184	0	0	0.000296287	1	0.418846	0.748306	0	0	4.8756e-05	1	0.42046
	SON	0.968075	0	0	0.00122887	1	1.79764	0.382673	0	0	0.00173242	1	0.519869	0.030303	1	2.85734	0.2	0	0
K+	bulk	0.11562	0	0	0.726168	0	0	0.226722	0	0	0.720762	0	0	0.713188	0	0	0.916381	0	0
	DJFM	0.738462	0	0	0.648503	0	0	1	0	0	0.643011	0	0	1	0	0	0.598091	0	0
	A	0.930736	0	0	0.428571	0	0	0.352381	0	0	0.309524	0	0	0.031746	1	0.352442	0.285714	0	0
	MJJA	0.0192668	1	0.711314	0.869276	0	0	0.870756	0	0	0.349575	0	0	0.797411	0	0	0.0804997	0	0
	SON	0.0258858	1	1.64197	0.0009724	1	1.98708	1	0	0	0.168816	0	0	0.121212	0	0	0.333333	0	0
Mg2+	bulk	0.227315	0	0	0.00751629	1	0.795994	0.0334789	1	0.772798	0.158577	0	0	0.552421	0	0	0.397704	0	0
	DJFM	0.438239	0	0	1	0	0	0.648503	0	0	0.153284	0	0	0.182683	0	0	0.958608	0	0
	A	1	0	0	1	0	0	0.47619	0	0	1	0	0	0.555556	0	0	0.730159	0	0
	MJJA	0.0118392	1	0.622274	0.0025578	1	0.568068	0.266077	0	0	0.44407	0	0	0.0952077	0	0	0.258853	0	0
	SON	0.0493286	1	1.3562	0.329719	0	0	0.0642523	0	0	0.976644	0	0	0.030303	1	4.72416	0.0666667	0	0
Ca2+	bulk	0.423378	0	0	0.00557096	1	0.632461	0.00277676	1	0.566265	0.0507518	0	0	0.440741	0	0	0.0189865	1	1.40679
	DJFM	0.285735	0	0	0.644373	0	0	0.742666	0	0	0.0848787	0	0	0.829448	0	0	0.118706	0	0
	A	0.536797	0	0	0.125541	0	0	0.352381	0	0	0.690476	0	0	0.730159	0	0	0.904762	0	0
	MJJA	0.124771	0	0	0.00198592	1	0.494331	0.0927219	0	0	0.0597035	0	0	0.304516	0	0	0.840641	0	0
	SON	0.095394	0	0	0.311985	0	0	0.104964	0	0	0.83762	0	0	0.0606061	0	0	0.1	0	0
F-	bulk	0.0438785	1	0.731356	0.00139669	1	0.53117				0.215733	0	0
	DJFM	0.842105	0	0	0.112754	0	0		F- lost		0.0451546	1	1.61894		F- lost			F- lost
	A	0.662338	0	0	0.261905	0	0		PM10C		0	0	0		PM10C			PM10C
	MJJA	0	0	0	0	0	0				0	0	0
	SON	0	0	0	0	0	0				0	0	0
Cl-	bulk	0.0148113	1	0.656846	0.103357	0	0				0.807211	0	0
	DJFM	0.666667	0	0	0.666667	0	0		Cl- lost for		0.153846	0	0		Cl- lost for			Cl- lost for
	A	0.4	0	0	0.5	0	0		PM10C		0.0571429	0	0		PM10C			PM10C
	MJJA	0.0909204	0	0	0.298128	0	0				0.519668	0	0
	SON	0.174142	0	0	0.771454	0	0				0.514786	0	0
Br-	bulk	0.0924829	0	0	0.66509	0	0	0.108678	0	0	0.707758	0	0	0.192263	0	0	0.00853564	1	1.51327
	DJFM	0.503497	0	0	0.285714	0	0	0.148252	0	0	0.518482	0	0	0.606394	0	0	0.340107	0	0
	A	0.420635	0	0	0.904762	0	0	0.412698	0	0	0.412698	0	0	0.685714	0	0	1	0	0
	MJJA	0.119234	0	0	0.323414	0	0	0.511502	0	0	0.553964	0	0	0.587552	0	0	0.407968	0	0
	SON	0.000219529	1	1.84067	0.0322195	1	2.13897	0.370028	0	0	0.728991	0	0	0.6	0	0	0.133333	0	0
NO3-	bulk	0.000627177	1	1.75637	0.575193	0	0				0.0377278	1	1.35694
	DJFM	1	0	0	0.17146	0	0		NO3- lost for		0.258911	0	0		NO3- lost for			NO3- lost for
	A	0.177489	0	0	0.914286	0	0		PM10C		0.031746	1	4.28497		PM10C			PM10C
	MJJA	1.43784e-05	1	2.1955	0.0412987	1	1.85534				0.106156	0	0
	SON	0.0135849	1	2.18298	0.196327	0	0				0.243861	0	0
SO42-	bulk	2.19681e-08	1	0.401937	0.319763	0	0	0.284203	0	0	0.000145405	1	0.454712	0.944924	0	0	6.62633e-06	1	0.498237
	DJFM	0.616587	0	0	0.703499	0	0	0.169706	0	0	0.220074	0	0	0.218039	0	0	0.01458	1	0.458394
	A	0.329004	0	0	0.930736	0	0	0.761905	0	0	0.150794	0	0	0.412698	0	0	0.0634921	0	0
	MJJA	3.96612e-07	1	0.246073	0.0469331	1	0.666561	0.270961	0	0	0.00144489	1	0.369168	0.492163	0	0	1.13342e-05	1	0.315567
	SON	0.343537	0	0	0.00334898	1	1.82394	0.124022	0	0	0.00375044	1	0.430142	0.121212	0	0	0.15	0	0
Methanesulfonate	bulk	0.175878	0	0	0.188235	0	0	5.81811e-05	1	0.575429	0.975932	0	0	0.00278546	1	1.48787	0.00807276	1	1.45517
	DJFM	0.847054	0	0	0.907869	0	0	0.777989	0	0	0.83986	0	0	0.926445	0	0	1	0	0
	A	0.0822511	0	0	0.662338	0	0	0.352381	0	0	0.690476	0	0	0.555556	0	0	0.0634921	0	0
	MJJA	0.402208	0	0	0.327677	0	0	0.000686382	1	0.607193	0.832519	0	0	0.00934742	1	1.42897	0.0121217	1	1.41551
	SON	0.446999	0	0	0.960342	0	0	0.0416544	1	0.273978	0.618689	0	0	0.030303	1	3.40059	0.1	0	0
Fornate	bulk	0.0223245	1	0.888239	0.0690701	0	0				0.919727	0	0
	DJFM	0.571429	0	0	1	0	0		Formate		0.623529	0	0		Formate			Formate
	A	0.133333	0	0	0.333333	0	0		lost for		0.133333	0	0		lost for			lost for
	MJJA	0.731507	0	0	0.144868	0	0		PM10C		0.597654	0	0		PM10C			PM10C
	SON	0.921294	0	0	0.146384	0	0				0.228571	0	0
Oxalate	bulk	0.00200516	1	0.746195	0.0906485	0	0	0.129217	0	0	0.414797	0	0	0.0121921	1	0.715231	0.000636293	1	0.617935
	DJFM	0.887774	0	0	0.167905	0	0	0.130968	0	0	0.221311	0	0	0.030239	1	0.475338	0.0738512	0	0
	A	0.177489	0	0	0.0380952	1	0.193597	0.609524	0	0	0.412698	0	0	0.0285714	1	0.155362	0.190476	0	0
	MJJA	0.000276249	1	0.380071	0.4226	0	0	0.159742	0	0	0.0235731	1	0.416446	0.0400151	1	0.609894	0.000469595	1	0.253988
	SON	0.513304	0	0	0.107249	0	0	0.33901	0	0	0.395092	0	0	0.727273	0	0	0.7	0	0
Glucose	bulk	0.571044	0	0	0.0779714	0	0	6.35132e-05	1	0.491246	0.215263	0	0	0.00501434	1	1.60496	0.000115054	1	1.81338
	DJFM	0.784874	0	0	0.839161	0	0	0.367677	0	0	0.641838	0	0	0.121989	0	0	0.0647867	0	0
	A	0.0952381	0	0	0.0952381	0	0	0.2	0	0	0.0555556	0	0	1	0	0	0.25	0	0
	MJJA	0.238646	0	0	0.110053	0	0	0.0295349	1	0.47369	0.844545	0	0	0.207026	0	0	0.160729	0	0
	SON	0.17266	0	0	0.409925	0	0	0.0253038	1	0.307351	0.976644	0	0	0.030303	1	3.86303	0.0166667	1	4.11473
Levoglucosan	bulk	0.07432	0	0	0.0010198	1	2.56034	0.69988	0	0	4.31636e-05	1	0.345097	0.00583833	1	3.32773	0.326771	0	0
	DJFM	0.541193	0	0	0.111111	0	0	0.690476	0	0	0.00206398	1	0.225004	0.0634921	0	0	0.13784	0	0
	A	0.730159	0	0	0.4	0	0	0	0	0	0	0	0	0	0	0	0	0	0
	MJJA	0	0	0	0	0	0	0	0	0	0	0	0	0	0	0	0	0	0
	SON	0	0	0	0	0	0	0	0	0	0	0	0	0	0	0	0	0	0
Mannosan	bulk	0.745789	0	0	1.13956e-05	1	3.36771	0.631883	0	0	0.00410488	1	0.421327	0.000988911	1	5.02829	0.858233	0	0
	DJFM	.-	-	-	0	0	0	0	0	0	0	0	0	0	0	0	0	0	0
	A	-	-	-	-	-	-	-	-	-	-	-	-	-	-	-	-	-	-
	MJJA	0	0	0	0	0	0	0	0	0	0	0	0	0	0	0	0	0	0
	SON	0	0	0	0	0	0	0	0	0	0	0	0	0	0	0	0	0	0
Galactosan	bulk	0.644974	0	0	0.000228199	1	3.62899	0.768278	0	0	0.0033366	1	0.3971	0.0120894	1	4.58525	0.541419	0	0
	DJFM	0	0	0	0	0	0	0	0	0	0	0	0	0	0	0	0	0	0
	A	0	0	0	0	0	0	0	0	0	0	0	0	0	0	0	0	0	0
	MJJA	0	0	0	0	0	0	0	0	0	0	0	0	0	0	0	0	0	0
	SON	0	0	0	0	0	0	0	0	0	0	0	0	0	0	0	0	0	0
Arabitol	bulk	5.10834e-05	1	2.25799	9.19379e-05	1	0.625172	1.25116e-08	1	0.334485	7.20739e-10	1	3.61178	2.57261e-06	1	1.86906	1.60502e-10	1	6.75065
	DJFM	0.0110716	1	4.03302	0.228571	0	0	0.904762	0	0	0.0975395	0	0	0.0666667	0	0	0.00292421	1	4.01729
	A	0.380952	0	0	0.333333	0	0	0.333333	0	0	0.0952381	0	0	1	0	0	0.0952381	0	0
	MJJA	0.334487	0	0	0.0028178	1	0.576886	9.69628e-06	1	0.28175	0.00057929	1	2.53921	0.000106815	1	2.04751	1.19468e-05	1	5.19905
	SON	1.51277e-05	1	4.26391	0.00502054	1	0.560535	0.0253038	1	0.222194	0.000151861	1	7.60686	0.0444444	1	2.52273	0.0166667	1	19.1901
Mannitol	bulk	0.0769636	0	0	0.203608	0	0	0.0624588	0	0	0.00271671	1	0.744578	0.00892103	1	1.58035	0.324302	0	0
	DJFM	0.536264	0	0	0.727273	0	0	0.785714	0	0	0.01164	1	0.55249	0.23976	0	0	0.505818	0	0
	A	0.0952381	0	0	0.2	0	0	0.333333	0	0	0.785714	0	0	0.8	0	0	0.571429	0	0
	MJJA	0.0578826	0	0	0.642927	0	0	0.0323545	1	0.478203	0.0210891	1	0.689173	0.0128512	1	2.0718	0.20073	0	0
	SON	0.167247	0	0	0.0678619	0	0	0.947368	0	0	0.504274	0	0	0.4	0	0	0.571429	0	0
